1 **Bidirectional control of mitochondrial respiration and**  
2 **permeability transition pore by nitric oxide donors and L-**  
3 **arginine. Implication of mitochondrial NO/cGMP/PKG -**  
4 **signaling system**

5

6

7 Vladimir V. Dynnik<sup>1\*</sup>, Elena V. Grishina<sup>1</sup>, Nadezhda I Fedotcheva<sup>1</sup>

8

9

10

11 <sup>1</sup> Department of bioenergetics, Institute of Theoretical and Experimental

12 Biophysics, Russian Academy of Sciences, Russia

13

14

15 \* Corresponding author

16 E-mail: [dynnik@rambler.ru](mailto:dynnik@rambler.ru)

## 17 **Abstract**

18 **Background/Aims:** Numerous studies have shown that cytosolic second  
19 messengers nitric oxide (NO) and cGMP and protein kinase G (PKG1) play  
20 important role in regulating cell viability by modulating mitochondrial  
21 permeability transition pore (MPTP) opening, necrotic and apoptotic cell death.  
22 The involvement of mitochondrial calcium-dependent NO-synthase (mtNOS) in  
23 the control of MPTP is much less explored. Moreover, possible functioning of  
24 mitochondrial mtNOS/guanylate cyclase (GC)/PKG-signaling system  
25 (mtNOS/PKG-SS) and its impact on mitochondrial respiration and MPTP have not  
26 been analyzed yet. **Methods:** To address the issue we performed the experiments  
27 on isolated rat liver mitochondria with the application of specific inhibitors of  
28 NOS, GC and PKG. Mitochondrial respiration was supported by pyruvate and  
29 glutamate or succinate plus rotenone in the presence of hexokinase and ADP.  
30 **Results:** Obtained results indicate that L-arginine and NO-donors (SNP, SNAP)  
31 produce bidirectional concentration-dependent effects on mitochondrial respiration  
32 and on MPTP opening evoked by calcium ions or palmitoylcarnitine excess. In low  
33 concentrations L-arginine (10 to 200  $\mu$ M) and NO-donors (10 to 50  $\mu$ M) activate  
34 the respiration and raise threshold concentrations of calcium and  
35 palmitoylcarnitine, required for dissipation of mitochondrial membrane potential  
36 and pore opening. The inhibitors of NOS, GC and PKG eliminate both effects,  
37 what disclose the involvement of mtNOS/PKG-SS in the activation of respiration  
38 and deceleration of MPTP opening. In high concentrations L-arginine and NO-

39 donors inhibit the respiration and promote MPTP opening. Observed alteration in  
40 the direction of L-arginine and NO-donors effects suggests that the inhibition  
41 evoked by mitochondrial NO excess may dominate over the protection afforded by  
42 mtNOS/PKG-SS. **Conclusions:** These findings demonstrate that the functioning of  
43 calcium-dependent mtNOS/PKG-SS, involved in complex calcium and NO  
44 interplay, might provide feedforward activation of the respiration and lowering the  
45 sensitivity of MPTP to calcium and palmitoylcarnitine excess.

46

## 47 **Introduction**

48 It is well appreciated that exogenous nitric oxide (NO) suppresses  
49 mitochondrial respiration by inhibiting cytochrome c oxidase (COX) and  
50 complexes I and II of the electron transport chain [1-5]. Activation of calcium-  
51 dependent mitochondrial NO-synthase (mtNOS) by its substrate L-arginine [6, 7]  
52 or by  $\text{Ca}^{++}$  and L-arginine [8] also causes sharp rise of mitochondrial NO coupled  
53 with the inhibition of oxygen consumption [6, 7]. However, in contrast to these  
54 unidirectional effects, contradictory effects of NO donors and mitochondrial NO  
55 on mitochondrial calcium retention capacity (CRC), mitochondrial permeability  
56 transition pore (MPTP) opening, and cytochrome c (CytC) release have been  
57 observed over last two decades.

58 As early as 1999, it was shown that over activation of mtNOS by  $\text{Ca}^{++}$  and  
59 L- arginine induces CytC release, while the inhibition of mtNOS diminishes CytC  
60 release, raises mitochondrial potential ( $\Delta\Psi_m$ ) and CRC [9]. In 2000, it was

61 demonstrated that NO evokes concentration-dependent effects [10]. It was shown  
62 that, being added in very low or high (supraphysiological) concentrations, NO  
63 donor SpermineNONOate promoted calcium evoked mitochondrial swelling, CytC  
64 release and MPTP opening, whereas in intermediate concentrations it caused  
65 protective effects. Protective and adverse effects of NO donors were attributed to  
66 possible action of S-nitrosothiols and peroxynitrite, correspondingly [9, 10].

67 Concentration-dependent effects of NO-donors were also demonstrated in  
68 the investigations performed on permeabilized cells, which have shown that NO-  
69 donors dose-dependently diminish mitochondrial  $\text{Ca}^{++}$  accumulation and, being  
70 applied in high doses, promote MPTP opening [11]. In these experiments added L-  
71 arginine prevented MPTP-opening and inhibited mitochondrial  $\text{Ca}^{++}$  uptake [11,  
72 12]. It was assumed that the inhibition of  $\text{Ca}^{++}$  uptake by intramitochondrial NO  
73 may represent negative feedback, which could prevent  $\text{Ca}^{++}$  overload and MPTP  
74 opening [11]. According to another point of view, NO induced mitochondrial  
75 depolarization was considered as possible mechanism preventing mitochondrial  
76  $\text{Ca}^{++}$  accumulation [13].

77 Ensuing studies confirmed important role of functional state of mtNOS in  
78 the determination of optimal range of NO concentrations, required for efficient  
79 MPTP control. However, in contrast to earlier results [9], it was shown that the  
80 inhibitors of mtNOS promote, while NO donors prevent the dissipation of  $\Delta\Psi_m$   
81 and mitochondrial swelling evoked by  $\text{Ca}^{++}$  in isolated mitochondria [14].

82 Prevention of MPTP opening, provided by intramitochondrial NO, was explained  
83 by the action of accumulated S-nitrosothiols [14].

84 Present time experiments also demonstrate that moderate doses of NO  
85 donor nitroglycerine rise CRC and prevent Ca<sup>++</sup>-dependent MPTP opening. The  
86 authors suppose that NO or reactive nitrogen species may be directly involved in  
87 the mechanism of mitochondrial calcium handling and MPTP blockade [15]. Dose-  
88 dependent effects of NO donor SNAP on the dissipation of  $\Delta\Psi_m$  and MPTP  
89 opening, evoked by Ca<sup>++</sup> load or palmitoylcarnitine, have been observed in our  
90 preliminary experiments on liver mitochondria [16].

91 Considered above inconsistent effects of NO donors and L-arginine on  
92 mitochondrial respiration,  $\Delta\Psi_m$  and MPTP cannot be explained by the  
93 mechanisms based only on redox regulation of mitochondrial processes, resulting  
94 in S-nitrosylation [17, 18] and S-glutathionylation [19-22] of numerous proteins.  
95 Potential intramitochondrial mechanisms of protection should implicate signaling  
96 chains, which are sensing intramitochondrial calcium level and involved in calcium  
97 and NO interplay. In favor of this hypothesis may be evidence of some data.

98 Recently Seya et al have found that cardiac mitochondrial protein fraction  
99 possess cGMP-dependent kinase (PKG) activity [23]. Mitochondrial cGMP  
100 production by undiscovered yet mitochondrial guanylate cyclase (GC) was also  
101 demonstrated by this group [24]. It was shown that SNAP or 8-Bromo-cGMP  
102 promote calcium-dependent CytC release implicating voltage-dependent anion  
103 channel (VDAC) as final target of this signaling pathway. Observed effects were

104 prevented by the application of the inhibitors of NOS, GC, PKG and VDAC.  
105 Hydrolysis of cGMP by mitochondrial cyclic nucleotide phosphodiesterase  
106 PDE2A was demonstrated in brain and liver mitochondria in independent  
107 experiments [25].

108 These data indicate that all elements of an autonomous  $\text{Ca}^{++}$ -dependent  
109 mtNOS/GC/PKG-signaling system (mtNOS/PKG-SS) may operate in  
110 mitochondria. The functioning of this system in mitochondria may look like  
111 redundant and duplicating mechanism with respect to cytosolic one. Really,  
112 cytosolic NO-synthases (cNOS), NO, GC, cGMP, and PKG1,2 are important  
113 signaling molecules involved in the regulation of multiple cytosolic and  
114 mitochondrial metabolic pathways and signaling systems [26-30]. Master kinase  
115 PKG1, downstream mediator of NO, is considered as last step of cytosolic  
116 cNOS/GC/PKG1-signaling system, being implicated in the control of wide range  
117 of physiological and pathological processes functioning at different time scales  
118 [27, 28]. It is well known that cytosolic PKG1 operates as final mediator of  
119 protection targeted to mitochondrial kinases, involved in MPTP control [27-32].  
120 However, listed above inconsistent effects of L-arginine and intramitochondrial  
121 NO on mitochondrial respiration and MPTP control are not related to the  
122 functioning of cytosolic signaling system and this issue requires further  
123 investigation. To investigate whether mitochondrial

124  **$\text{Ca}^{++} \rightarrow \text{mtNOS} \rightarrow \text{NO} \rightarrow \text{GC} \rightarrow \text{cGMP} \rightarrow \text{PKG-}$**

125 signaling system (mtNOS/PKG-SS) might be involved in the control of  
126 mitochondrial respiration and MPTP opening, we have performed the experiments  
127 on isolated rat liver mitochondria. Specific agonists and inhibitors of this signaling  
128 system were applied to evaluate its positive and negative impact on mitochondrial  
129 respiration and dissipation of  $\Delta\Psi_m$  and MPTP opening, evoked by  $Ca^{++}$  or  
130 palmitoylcarnitine excess. Preliminary results were published earlier [16].

131

## 132 **Materials and methods**

133 All animal procedures were performed in accordance with EU directive  
134 86/609/EEC and have been approved by the Ethics committee of the Institute of  
135 Theoretical and Experimental Biophysics, RAS, Russia. protocol № 03-16-03-18.  
136 Male 6-8 week old Wistar rats were kept under the same conditions in air-  
137 conditioned and ventilated rooms at 20-22° C and a 12 h/12 h light-dark cycle. All  
138 experiments were performed at 26° C. Rats were euthanized with CO<sub>2</sub> Liver  
139 mitochondria were isolated using standard techniques of differential centrifugation  
140 in the medium containing 300 mM sucrose, 1 mM EGTA, and 10 mM Tris-HCl  
141 (pH 7.4). Mitochondrial preparations were washed twice with the release medium  
142 not containing EGTA, resuspended in the medium of the same composition, and  
143 stored on ice as described earlier [16]. Mitochondria incubation medium contained:  
144 125 mM KCl, 3 mM KH<sub>2</sub>PO<sub>4</sub>, 10 mM HEPES (pH 7.4), 0.5 mM MgCl<sub>2</sub>.  
145 Mitochondrial protein content was determined by Lowry method with bovine  
146 serum albumin as standard. Oxygen consumption in the mitochondrial suspension

147 was determined by a polarographic method with a Clark type O<sub>2</sub> electrode in  
148 closed chamber of 1mL, containing 1.0-1.2 mg mit. protein, under continuous  
149 stirring. The electric potential difference ( $\Delta\Psi_m$ ) on the inner mitochondrial  
150 membrane was measured by determining the redistribution of lipophilic cation  
151 tetraphenylphosphonium (TPP<sup>+</sup>) between incubation medium and mitochondria.  
152 Fall in the concentration of TPP<sup>+</sup> reflect the rise in  $\Delta\Psi_m$ . Concentration of TPP<sup>+</sup>  
153 [TPP<sup>+</sup>] in the mitochondrial incubation medium was recorded with TPP<sup>+</sup> selective  
154 electrode. Changes in calcium ion concentration in the incubation medium were  
155 recorded by the Ca<sup>++</sup> selective electrode (Nico, Moscow, Russia). Simultaneous  
156 registration of  $\Delta\Psi_m$  and Ca<sup>++</sup> were carried out in open chamber of 1 ml, containing  
157 1.0-1.2 mg mit protein, under continuous stirring. Mitochondrial swelling was  
158 monitored as a decrease in the optical density of a mitochondrial suspension  
159 (0.35mg/mL) in open chamber of 2 mL. Absorbance at 540 nm was measured  
160 using Ocean Optics USB4000 spectrophotometer.

161

## 162 **Background of the protocol of experiments**

163 L-glutamate (10 mM) and pyruvate (0.5-1 mM) were used as substrates to  
164 keep turnover of both spans of the Krebs cycle running, provide sufficient NADPH  
165 production, and preserve substrate-level phosphorylation in the Cycle. In some  
166 experiments mitochondrial respiration was supported by succinate (5mM) and  
167 rotenone (2  $\mu$ M) or pyruvate (1 mM) and L-malate (5mM). All experiments were  
168 performed in the presence of 10 IU hexokinase, 10 mM glucose and 0.5 mM



169 MgCl. Subsequent addition of 0,75mM ADP provided high steady state respiration  
170 rate ( $VO_{2ss}$ ), which was close to State 3 respiration rate (80-90 % of  $VO_{2max}$ ). All  
171 values of  $VO_{2ss} = d[O_2]/dt$  were calculated on linear parts of polarographic tracks  
172 at appropriate values of  $pO_2$  (as indicated in corresponding legends).

173

## 174 **Measurement of the parameters characterizing MPTP opening in** 175 **isolated mitochondria**

176       Opening of the MPTP was registered as: loss of calcium buffering capacity  
177 (characterized by steep rise of calcium in the incubation medium); dissipation of  
178 mitochondrial  $\Delta\Psi_m$ ; mitochondrial swelling. Induction of MPTP was achieved by  
179 sequential loading of the incubation medium with 20  $\mu M$  of  $Ca^{++}$  ( $CaCl_2$ ) or 20  
180  $\mu M$  D,L-palmitoylcarnitine (PC). Total concentrations of added  $Ca^{++}$  or PC,  
181 required for pore opening, determined mitochondrial CRC and threshold  
182 concentration of PC (PC\*). Maximal mitochondrial swelling rate ( $V_{sw}$ ) was  
183 determined as  $V_{sw} = \Delta o.d./min$ . The impact of mtNOS/PKG-SS on mitochondrial  
184 steady state respiration or on MPTP opening was evaluated by the determination of  
185 the values of  $VO_{2ss}$  or of CRC, PC\*, and  $V_{sw}$ , respectively. Activation of mtNOS-  
186 SS was attained by the application of L-arginine, NO-donors, and  $Ca^{++}$ . 7-NI,  
187 ODQ, and KT5823 were used to inhibit mtNOS, GC and PKG, correspondingly.

188

## 189 **Materials**

190 All reagents were purchased from Tocris (UK) and Sigma (USA). S-  
191 nitrosoacetylpenacillamine (SNAP), 7- Nitroindazole (7-NI) and 1H-  
192 [1,2,4]oxadiazolo[4,3-a]quinoxalin-1-one (ODQ) were dissolved in ethanol and  
193 KT5823-in dimethyl sulfoxide (DMSO). Final concentration of DMSO was 0.1-  
194 0.2%. Sodium nitroprusside (SNP) was dissolved in the water.

195

## 196 **Statistics**

197 Statistical analysis of the experimental data was carried out by applying  
198 ANOVA One Way Tukey's Test. The columns depicted on the Figures represent  
199 mean of four values, which were registered in separate experiments carried out on  
200 mitochondrial preparations. Data presented as mean  $\pm$  S.E.M. of 4 independent  
201 experiments.  $P < 0.05$  was taken as the level of significance.

202

203

204

## 205 **Results**

### 206 **Bidirectional concentration-dependent effects of NO-donors and L-** 207 **arginine on mitochondrial respiration. Impact of mtNOS/PKG-SS**

208 Coupled rat liver mitochondria, respiring on 10 mM L-glutamate and 0.5  
209 mM pyruvate as substrates, have mean resting state respiration rate about  $19 \pm$

210 1.4ng-at O/min/mg prot. Addition of 0.75 mM ADP increased oxygen  
211 consumption rate to steady state values  $VO_{2ss} = 54.5 \pm 1.7$  ng-at O/min/mg prot.  
212 Representative polarographic traces ( $O_2$  traces) are depicted at Fig 1. Black traces  
213 correspond to control experiments, while coloured traces characterize the influence  
214 of low and high concentrations of NO donor SNP (Fig 1A) and L-arginine (Fig 1B)  
215 on mitochondrial respiration.

216 **NO-donors and L-arginine evoke activation or inhibition of mitochondrial**  
217 **respiration in dependence of the concentrations used**

218 Preincubation of mitochondria with low concentrations of SNP (20  $\mu$ M;  
219 blue trace at Fig 1A) or L-arginine (20  $\mu$ M; blue trace at Fig. 1B) resulted in the  
220 increase of oxygen consumption rate (rise of the trace slope). High concentrations  
221 of SNP (400  $\mu$ M; red trace, Fig 1A) and L-arginine (1000  $\mu$ M; red trace, Fig 1B)  
222 evoked the inhibition of mitochondrial respiration.

223 To evaluate statistical significance of obtained results, steady state values  
224 of  $VO_{2ss}$  were measured at  $[O_2] = 300-320$  ng-atO/mL on linear parts of  
225 corresponding polarographic traces in the series of four experiments. Calculated  
226 average values of  $VO_{2ss}$  are depicted at Fig 2 in the form of columns. Grey  
227 columns correspond to control experiments with  $VO_{2ss} = 54.5 \pm 1.7$  ng-at  
228 O/min/mg prot. This value of  $VO_{2ss}$  was taken as 100%. Two sets of black  
229 columns characterize the impact of different concentrations of SNP (Fig 2A ) and  
230 L-arginine (Fig 2B) on mean values of  $VO_{2ss}$ . Presented data show that the  
231 application of 5-50  $\mu$ M SNP produces marked activation of steady state

232 mitochondrial respiration rate. Maximal increase of  $VO_{2ss}$  by 38% was observed  
233 at 20 $\mu$ M SNP (Fig 2A, second black vs. gray columns). In a like manner, 20 $\mu$ M of  
234 L-arginine raises steady state respiration rate by 33% (Fig 2B, second black vs.  
235 gray columns).

236 Higher concentrations of SNP (50-400  $\mu$ M) and L-arginine (200-1000  $\mu$ M)  
237 dose-dependently diminish mean values of mitochondrial steady state respiration  
238 rate. Moreover, high concentrations of SNP (400  $\mu$ M ) and L-arginine (1000  $\mu$ M)  
239 suppress respiration rate by 20-22 % compared to control state respiration (right  
240 black vs. gray columns at Fig 2A, 2B respectively). Registered inhibition of  
241 mitochondrial respiration by SNP and L-arginine represents well known  
242 phenomenon [5-7]. It may be explained, for example, by known competitive (with  
243 respect to oxygen) inhibition of COX by the excess of NO released from SNP or  
244 produced by mtNOS from L-arginine [1, 6]. Red trace at Fig 1A demonstrates that  
245 mitochondria cannot maintain steady state respiration at the excess of SNP (400  
246  $\mu$ M). The decrease of  $O_2$  content in the medium is accompanied by progressive  
247 suppression of the respiration.

248 Discovered activation of the respiration by low concentrations of L-  
249 arginine or SNP was statistically significant in all presented above experiments ( $p <$   
250 0.05). It may be also evoked by low doses of NO-donor SNAP, which stimulates  
251  $VO_{2ss}$  in the range of concentrations from 10 to 100  $\mu$ M (not shown). Besides, the  
252 effects of NO-donors and L-arginine do not depend on the substrates used and may  
253 be reproduced on mitochondria respiring with pyruvate and malate or succinate (5

254 mM) plus rotenone (2  $\mu$ M). In the last case, the preincubation of mitochondria with  
255 10  $\mu$ M SNP or 20  $\mu$ M L-arginine raised steady state respiration rate by 24% and  
256 19%, correspondingly, in comparison with control state respiration rate ( $93.5 \pm 3.4$   
257 ng-at O/min/mg prot).

258

259 **Fig 1. Activation and inhibition of mitochondrial respiration by NO-donor**  
260 **SNP (left) and L-arginine (right).** Concentration- dependent effects of SNP (A)  
261 and L-arginine (B) on mitochondrial respiration are depicted by representative  
262 polarographic traces ( $O_2$  traces). Mitochondria (1.0-1.2 mg) were incubated in  
263 closed chamber of 1 mL. Incubation medium included 0.5 mM pyruvate, 10 mM  
264 L-glutamate and hexokinase. Steady state respiration was evoked by 0.75 mM  
265 ADP. Black traces correspond to control experiments. Concentration- dependent  
266 effects of SNP (A) and L-arginine (B) on mitochondrial respiration. Blue traces fit  
267 to low concentrations of SNP (A; 20  $\mu$ M) and L-arginine (B; 20  $\mu$ M) in the  
268 medium. Red traces match to high concentrations of SNP (A; 400  $\mu$ M) and L-  
269 arginine (B, 1000  $\mu$ M). All explanations are given in the text.

270

271 **Fig 2. Bidirectional concentration-dependent effects of SNP (A) and L-**  
272 **arginine (B) on mean steady state respiration rate ( $VO_{2ss}$ ) and involvement of**  
273 **mtNOS/PKG-SS in the activation mitochondrial respiration by low**  
274 **concentrations of SNP and L-arginine.** All conditions of the experiments  
275 correspond to Figure 1. All columns represent mean values of steady state

276 respiration rates  $VO_{2ss}$ . Grey columns correspond to control experiments. Black  
277 columns describe the experiments performed with different concentrations of SNP  
278 (A) and L-arginine (B) in the medium. Hatched columns depict the impact of the  
279 inhibitors of NOS, GC, and PKG (7-NI, ODQ, and KT5823, respectively) on mean  
280 values of  $VO_{2ss}$ . Individual values of  $VO_{2ss}$  were calculated on linear parts of  
281 corresponding polarographic traces at the concentrations of  $[O_2] = 300-320$  ng-  
282 atom O/mL. Data represent means  $\pm$  S.E. of 4 separate experiments for each  
283 column ( $n = 4$ ). Concentrations of SNP, L-arginine (L-Arg), 7-NI, ODQ, and  
284 KT5823 (KT) are given in  $\mu$ M. Control value of  $VO_{2ss} = 54.5 \pm 1.7$  ng-at O/min/mg  
285 prot was taken as 100%. \* =  $p < 0.05$  compared to control value of  $VO_{2ss}$  (gray  
286 columns) or values of the experiments with 20  $\mu$ M of SNP or L-arginine (second  
287 black columns).

288

289

290

## 291 **Involvement of mtNOS/PKG-SS in the activation of mitochondrial respiration**

292 Analyzing observed activation of the respiration by low concentrations of  
293 SNP, SNAP and L-arginine, we have supposed that mtNOS/PKG-SS may be  
294 involved in the regulation of the respiration and/or energy metabolism. To  
295 investigate whether the inhibition of this signaling system could abrogate  
296 activation of mitochondrial respiration by NO-donors and L-arginine, we  
297 performed the experiments with the application of respective inhibitors of mtNOS,

298 GC, and PKG. The results presented at Fig 2 by hatched columns demonstrate the  
299 impact of 7-NI, ODQ, and KT5823 on steady state respiration rate. Fig 2A shows  
300 that ODQ and KT5823 prevent activating effect of SNP by lowering mean  $VO_{2ss}$   
301 (two hatched vs. first black columns). In a like manner, the activation of the  
302 respiration by 20  $\mu$ M L-arginine was not observed after the incubation of  
303 mitochondria with 7-NI, ODQ, and KT5823 (Fig 2B, three hatched vs. first black  
304 columns). Similar effects of the inhibitors were observed in mitochondria respiring  
305 on succinate plus rotenone (not shown).

306         These results led us to suggest that PKG might be involved in the  
307 regulation of oxidative phosphorylation by phosphorylating some proteins, like to  
308 the mechanism provided by mitochondrial adenylate cyclase (AC)/protein kinase A  
309 (PKA) cascade [33-36]. If this is the case, than activation of mtNOS/PKG-SS by  
310 L-arginine may provide bidirectional control of the respiration, which includes the  
311 activation of respiration with the involvement of PKG and direct inhibition of  
312 cytochromes by NO excess (and/or its derivatives). Soluble GC has about ten times  
313 higher affinity to NO than COX [7]. Assuming comparable sensitivity to NO of  
314 mitochondrial and cytosolic GC, we might speculate that at low concentrations of  
315 L-arginine (or NO) the activation of respiration by PKG will dominate over well  
316 known inhibitory effect of NO [1-6].

317

318 **Activation of cyclosporine A-dependent MPTP opening by**  
319 **palmitoylcarnitine. Impact of low concentrations of L-arginine**

320 Previously we have shown that in rat liver mitochondria, respiring on  
321 pyruvate and L-glutamate, added D, L-palmitoylcarnitine (PC) induces  
322 cyclosporine A (CsA) sensitive MPTP opening. Activation of mitochondrial  
323 respiration by ADP resulted in lowering of critical concentration of PC (PC\*)  
324 required for pore opening [16].

325 **Dissipation of mitochondrial potential, inhibition of respiration, and**  
326 **mitochondrial swelling induced by PC. Protection provided by CsA**

327 Preincubation of mitochondria with pyruvate, L-glutamate and low  
328 concentrations of PC (20-25  $\mu\text{M}$ ) raised  $\Delta\Psi\text{m}$  and accelerated steady state  
329 mitochondrial respiration rate by 35- 40% in comparison with the values attained  
330 with pyruvate and L-glutamate (not shown). On the contrary, high doses of PC  
331 (above 50  $\mu\text{M}$ ) evoked steep dissipation of  $\Delta\Psi\text{m}$  (rise of  $[\text{TPP}^+]$ ) and progressive  
332 inhibition of the respiration. This process is developed soon after addition of ADP  
333 (Fig 3A; black traces). Added CsA prevented the dissipation of  $\Delta\Psi\text{m}$ , in spite of  
334 profound suppression of the respiration (Fig 3A; blue traces).

335 Besides dissipation of  $\Delta\Psi\text{m}$  and suppression of the respiration, PC induced  
336 mitochondrial swelling. As shown at Fig 3B, low concentrations of PC (20  $\mu\text{M}$ )  
337 evoked mitochondrial swelling, which was characterized by swelling rate  $V_{\text{sw}} =$   
338 0.26 a.u./min (black trace). Preincubation of mitochondria with CsA (2  $\mu\text{M}$ )  
339 prevented this effect (blue trace). Second addition of 20  $\mu\text{M}$  PC resulted in deep  
340 mitochondrial swelling, characterized by  $V_{\text{sw}} = 2.4$  a.u./min (black trace).  
341 However, in this case CsA produced limited protective effect diminishing  $V_{\text{sw}}$



342 four times to 0.57 a.u./min and having no effect on the magnitude of mitochondrial  
343 swelling (blue trace).

344

345 **Fig 3. PC excess evokes dissipation of  $\Delta\Psi_m$ , suppression of respiration and**  
346 **mitochondrial swelling. Impact of Cyclosporine A.** Representative experiments  
347 are depicted. (A): Impact of PC excess (50  $\mu\text{M}$ ) and CsA (1.5-2  $\mu\text{M}$ ) on  
348 mitochondrial respiration ( $\text{O}_2$  traces) and  $\Delta\Psi_m$  (TPP<sup>+</sup> traces). Mitochondrial  
349 incubation medium included 10 mM of L-glutamate and 1mM pyruvate.  
350 Mitochondria were preincubated with PC (50  $\mu\text{M}$ ; black traces) or with PC and  
351 CsA (1.5  $\mu\text{M}$ ; blue traces). All other conditions as at Fig 1. (B): Mitochondrial  
352 swelling evoked by PC in the absence (bottom trace) and in the presence of CsA  
353 (2  $\mu\text{M}$ , top trace) in the media. PC (20  $\mu\text{M}$ ) was added two times as indicated.  
354 Maximal values of the rate of swelling ( $V_{\text{sw}}$ , expressed in a.u./min) are indicated  
355 on the traces. The experiments were carried out in open chamber of 2 mL,  
356 containing 0.35 mg prot/mL of mitochondria. 0.75 mM ADP was added 1 min  
357 before first application of PC. Incubation medium included 5 mM of succinate and  
358 2  $\mu\text{M}$  rotenone. All other conditions as at Fig 1.

359

360

361

362 **Protective effect of L-arginine on the dissipation of  $\Delta\Psi_m$  and inhibition of**  
363 **mitochondrial respiration evoked by PC**

364           Profound fall of  $\Delta\Psi_m$  and suppression of the respiration may be also  
365 evoked by PC added in the phase of active steady state respiration induced by  
366 ADP. Fig 4A shows that the application of 50  $\mu\text{M}$  PC (PC\*) produced the  
367 dissipation of  $\Delta\Psi_m$  and suppression of the respiration (black traces). Preincubation  
368 of mitochondria with 200  $\mu\text{M}$  L-arginine prevented the dissipation of  $\Delta\Psi_m$  and  
369 restored active steady state respiration (green traces). PKG inhibitor KT5823  
370 abrogated protective effects of L-arginine by restoring the dissipation of  $\Delta\Psi_m$  and  
371 inhibition of the respiration evoked by PC (red traces). It should to mention that, in  
372 comparison with L-arginine, CsA prevents only the dissipation of  $\Delta\Psi_m$  (pore  
373 opening) but cannot reactivate mitochondrial respiration (Fig 3A; blue traces).

374           Based on these results, we may suppose that two separate protective  
375 mechanisms may be realized with the implication of mtNOS/PKG-SS. First  
376 mechanism might be directed to the regulation of mitochondrial respiration. This  
377 mechanism may implicate the same signaling events, which provide the activation  
378 of the respiration by L-arginine in the absence of PC (Fig 1 and 2). Second  
379 mechanism of protection may be directed on MPTP control and based on the  
380 phosphorylation of some key proteins by PKG.

381           Interestingly, protective effect of L-arginine is not realized in mitochondria  
382 respiring on succinate plus rotenone (Fig 4B). In this case, added 50  $\mu\text{M}$  PC also  
383 evoked dissipation of  $\Delta\Psi_m$  and suppression of the respiration (black traces),  
384 however L-arginine did not protect mitochondria against deleterious effect of PC  
385 (green traces). Observed dissimilarity of L-arginine effects (Fig 4A and 4B) may

386 be explained, assuming that mitochondria respiring on succinate plus rotenone (at  
387 PC excess) cannot provide substrate-level phosphorylation in the Krebs cycle to  
388 keep appropriate level of GTP, required for cGMP production by GC and  
389 subsequent activation of PKG.

390

391 **Fig 4. L-arginine prevents dissipation of  $\Delta\Psi_m$  and suppression of respiration**  
392 **evoked by PC excess (A). Absence of protective effect of L-arginine in**  
393 **mitochondria respiring on succinate plus rotenone (B).** Representative  
394 experiments are depicted. (A): Impact of PC excess (50  $\mu\text{M}$ ) and L-arginine (200  
395  $\mu\text{M}$ ) on mitochondrial respiration ( $\text{O}_2$  traces) and  $\Delta\Psi_m$  (TPP<sup>+</sup> traces).  
396 Mitochondrial incubation medium included 10 mM of L-glutamate and 1mM  
397 pyruvate. PC was added 1 min after activation of the respiration by 0.75 mM ADP.  
398 Mitochondria were preincubated: without (black traces), with L-arginine (green  
399 traces), and with L-arginine plus 1.5  $\mu\text{M}$  KT5823 (red traces). All other conditions  
400 as at Fig 3A. (B): All conditions of the experiment corresponds to those of Panel  
401 A, except that incubation medium included 5 mM succinate plus 2  $\mu\text{M}$  rotenone.  
402 Abbreviations: L-Arg = L-arginine; KT = KT5823.

403

404

405

406 **Impact of mtNOS/PKG-SS on the values of threshold concentrations**  
407 **of PC required for dissipation of  $\Delta\Psi_m$**

408 To evaluate critical (threshold) concentrations of PC\*, providing the  
409 dissipation of  $\Delta\Psi_m$  (and activation of MPTP opening), we used sequential loading  
410 of the incubation medium with 20  $\mu\text{M}$  PC till the time point characterized by fast  
411 fall of  $\Delta\Psi_m$ . This procedure is shown at Figure 5A. Brown line corresponds to  
412 control mitochondria, in which third addition of PC ( $\text{PC}^* = 60 \mu\text{M}$ ) evokes steep  
413 fall of  $\Delta\Psi_m$  (rise of  $[\text{TPP}^+]$  in medium). Green line describes the influence of 100  
414  $\mu\text{M}$  SNAP on  $\Delta\Psi_m$ . SNAP provides partial protection by raising total  
415 concentration of added PC to new critical value of  $\text{PC}^* = 100 \mu\text{M}$ . Two diagrams  
416 presented at Fig 5B and 5C characterize the involvement of mtNOS/PKG-SS in the  
417 regulation of MPTP sensitivity to PC.

418

419 **Concentration-dependent effect of NO-donor SNAP on MPTP opening by PC.**

420 Added SNAP raises  $\text{PC}^*$  level in concentration-dependent manner (Fig 5B,  
421 blue and violet vs. black columns), being most effective at 100  $\mu\text{M}$  (violet  
422 column). This optimal concentration of SNAP provides effective protection by  
423 lowering MPTP protein complex sensitivity to PC in comparison with control  
424 state. Preincubation of mitochondria with 100  $\mu\text{M}$  SNAP increases critical  $\text{PC}^*$   
425 level from  $50.0 \pm 5.8 \mu\text{M}$  to  $95.0 \pm 6.2 \mu\text{M}$  (violet vs. black columns). High  
426 concentrations of SNAP (300  $\mu\text{M}$ ; grey column) were ineffective.

427 Observed protection, afforded by low concentrations of SNAP (to 100  $\mu\text{M}$ ),  
428 was eliminated by the application of GC and PKG inhibitors ODQ and KT5823  
429 (Fig 5B; red and green columns). As a result, the sensitivity of  $\Delta\Psi\text{m}$  (and MPTP)  
430 to PC excess increased about two times. Critical PC\* values, providing the  
431 dissipation of  $\Delta\Psi\text{m}$ , diminished from maximal values of  $95.0 \pm 6.2 \mu\text{M}$  (violet  
432 column) to  $45.0 \pm 5.0 \mu\text{M}$  and  $55.0 \pm 5.0 \mu\text{M}$  (green and red columns), which were  
433 close to control values of  $\text{PC}^* = 50.0 \pm 5.8 \mu\text{M}$  (black column).

434

435 **Fig 5. Impact of mtNOS/PKG-SS on threshold concentrations of D, L-**  
436 **palmitoylcarnitine (PC\*) required for the dissipation of  $\Delta\Psi\text{m}$  and MPTP**  
437 **opening.** (A): An example of threshold PC\* concentrations determination.  
438 Mitochondria (1.0-1.1 mg) were incubated in open chamber of 1 mL without  
439 (control, brown trace) or with 100  $\mu\text{M}$  SNAP (green trace). Conditions of the  
440 experiment correspond to those of Fig 1.  $\text{Ca}^{++}$  (20  $\mu\text{M}$ ) was added before the  
441 stimulation of mitochondrial respiration by 750  $\mu\text{M}$  ADP. Third addition of 20  $\mu\text{M}$   
442 PC evoked fall of  $\Delta\Psi\text{m}$  (rise of  $\text{TPP}^+$ ) and pore opening, what fits to threshold  
443 value of  $\text{PC}^*=60 \mu\text{M}$ . Preincubation of mitochondria with SNAP diminished  
444 probability of pore opening by raising PC\* to 100  $\mu\text{M}$ ; (B): Diagram incorporates  
445 mean threshold values of PC\* measured in control experiments (black columns)  
446 and in the experiments with mitochondria preincubated with SNAP (blue and  
447 violet columns), SNAP + ODQ and SNAP + KT5823 (red and green columns);  
448 \* $p < 0.05$  compared to control PC\* value (black) or to the value of experiment with

449 SNAP (violet column). (C): Diagram describes the impact of L-arginine (L-Arg)  
450 on mean threshold values of PC\* and elimination of protective effect of L-arginine  
451 by 7-NI, ODQ, and KT5823 (brown, red and green columns). KT = KT5823. All  
452 concentrations are given in  $\mu\text{M}$ . Data represent means  $\pm$  S.E. n = 4. \*p < 0.05  
453 compared to PC\* value of gray column or to PC\* value of experiment with L-  
454 arginine (violet column).

455

456

457

#### 458 **Impact of L-arginine on the dissipation of $\Delta\Psi_m$ by PC**

459 Calcium and PC act synergistically by reinforcing effects each other [16].  
460 This statement may be illustrated by black and grey columns at Figure 5C. In  
461 control experiments mean PC\* value was equal to  $55.0 \pm 5.0 \mu\text{M}$  (black column).  
462 Preincubation of mitochondria with  $20 \mu\text{M Ca}^{++}$  resulted in lowering of PC\* to  
463  $45.0 \pm 5.0 \mu\text{M}$  (gray column). Higher concentrations of  $\text{Ca}^{++}$  provided profound  
464 lowering of PC\*. Taking into account multiple positive and negative effects of  
465 calcium on mitochondrial energy metabolism, mtNOS and MPTP [8, 37], we used  
466 this boundary concentration of  $\text{Ca}^{++}$  ( $20 \mu\text{M}$ ) to analyze protective effect of L-  
467 arginine on the dissipation of  $\Delta\Psi_m$  by PC. Optimal concentration of mtNOS  
468 substrate L-arginine ( $500 \mu\text{M}$ ) was applied to avoid adverse effects of higher doses  
469 of L-arginine (above  $1000 \mu\text{M}$ ) on mitochondrial respiration (Fig 1B and 2B) and

470 threshold PC\* concentrations (Fig 5C; light blue column). In the experiments  
471 presented at Fig 5C preincubation of mitochondria with 500  $\mu$ M L-arginine  
472 substantially raised critical PC\* level from  $45.0 \pm 5.0 \mu$ M to  $80.0 \pm 8.2 \mu$ M (violet  
473 vs. gray columns) by strengthening protective mechanisms. Observed effect of L-  
474 arginine was eliminated by the inhibitors of NOS, GC and PKG (brown, green and  
475 red columns), which returned critical PC\* values to the range of control values of  
476  $PC^* = 45-50 \pm 5.0 \mu$ M.

477 Like SNAP, high concentrations of L-arginine (above 2000  $\mu$ M) did not  
478 provide protective effect and even promoted pore opening by diminishing  
479 threshold PC\* concentrations to control values (Fig 5C; light blue vs. gray  
480 columns).

481 Thus, results presented at Fig 5 denote that the activation of mtNOS/PKG-  
482 SS, evoked by optimal concentrations of L-arginine or SNAP, may implicate new  
483 protective mechanisms, which may provide the rise of threshold concentration of  
484 PC\* required for the dissipation of  $\Delta\Psi_m$  and MPTP opening. Studied protective  
485 effects have not been observed at the concentrations of L-arginine and SNAP  
486 higher than 1000  $\mu$ M and 200  $\mu$ M, respectively. Apparently, observed adverse  
487 effects of high concentrations of L-arginine and SNAP may be based on the  
488 inhibition of the respiratory chain and MPTP complex proteins by NO and/or its  
489 derivatives. Likely, this inhibition may dominate over protective effect of  
490 mtNOS/PKG-SS at the excess of intramitochondrial NO.

491

492 **Involvement of mtNOS/PKG)-SS in the control of calcium retention**  
493 **capacity**

494 Calcium retention capacity (CRC), i.e. critical concentration of  $\text{Ca}^{++}$   
495 required for pore opening, was measured by standard procedure of sequential  
496 loading of the medium with 20  $\mu\text{M}$  of  $\text{Ca}^{++}$  ( $\text{CaCl}_2$ ). This procedure is depicted at  
497 Fig 6A, which demonstrates that the incubation of mitochondria with the inhibitor  
498 of PKG KT5823 (2  $\mu\text{M}$ ) diminishes CRC from control value of 140  $\mu\text{M}$  to 100  $\mu\text{M}$   
499 (red vs, blue lines). The fifth addition of 20  $\mu\text{M}$   $\text{Ca}^{++}$  is accompanied by steep  
500 decrease of  $\Delta\Psi\text{m}$  (rise of  $\text{TPP}^+$ ) and rise of  $\text{Ca}^{++}$  in the medium (red lines). Two  
501 diagrams presented at Fig 6B and 6C characterize the involvement of  
502 mtNOS/PKG-SS in the control of CRC.

503 **Control of Mitochondrial Calcium Retention Capacity by NO-donors**

504 Preincubation of mitochondria with low concentrations of PC (20  $\mu\text{M}$ )  
505 diminished CRC from control value of  $135.0 \pm 5.0$  to  $110.0 \pm 5.7$   $\mu\text{M}$  (Fig 6B,  
506 grey vs. black columns). This lowering of CRC by 19% demonstrates synergistic  
507 action of  $\text{Ca}^{++}$  and PC and might indicate on the involvement of long chain  
508 AcylCoA's in the regulation of intramitochondrial  $\text{Ca}^{++}$  threshold for pore opening.  
509 Application of low concentrations of NO-donors SNP and SNAP (up to 50  $\mu\text{M}$ )  
510 caused protective effect by raising mean CRC on 50-70% (Fig 6B; violet vs. gray  
511 columns). This protection was eliminated by the inhibitors of the enzymes of  
512 mtNOS/PKG-SS. Preincubation of mitochondria with GC inhibitor ODQ resulted



513 in significant shortage of CRC values for SNP and SNAP nearly to control values  
514 (Fig 6B, green vs. violet columns). Inhibitor of PKG (KT5823, 2  $\mu$ M) produced  
515 similar effect (Fig 6B, red vs. violet columns). Higher concentrations of SNP (100  
516 and 200  $\mu$ M) evoked opposite effect by diminishing CRC two to three times (Fig  
517 6B, blue and light-blue vs. violet columns). Observed promotion of pore opening  
518 by SNP excess may be based on inhibition of the respiratory chain and MPTP  
519 complex proteins by NO, nitrosothiols, etc.

520

521 **Fig 6. Involvement of mtNOS/PKG-SS in the regulation of mitochondrial**  
522 **calcium retention capacity (CRC).** (A): Determination of CRC values by  
523 registering steep alterations of  $\Delta\Psi_m$  (TPP<sup>+</sup>, top traces) and Ca<sup>++</sup> concentration in  
524 medium (bottom traces). Mitochondria (1.0 mg) were incubated in open chamber  
525 of 1 mL without (control) or with 2  $\mu$ M KT5823 (KT). Conditions of the  
526 experiment correspond to those of Fig 1. PC (20  $\mu$ M) was added after the  
527 stimulation of respiration by 750  $\mu$ M ADP. Seventh addition of 20  $\mu$ M Ca<sup>++</sup>  
528 evoked an extrusion of Ca<sup>++</sup> from the matrix, dissipation of  $\Delta\Psi_m$ , and pore  
529 opening in control mitochondria, what corresponds to CRC = 135  $\mu$ M. Inhibitor of  
530 PKG KT5823 diminished CRC to 100  $\mu$ M (B): Diagram describes protective  
531 effects of SNP and SNAP on pore opening by Ca<sup>++</sup> overload. Presented mean  
532 values of CRC for control mitochondria (black columns) and for mitochondria  
533 preincubated with SNP, SNAP and inhibitors of GC (ODQ) and PKG (KT5823);  
534 Control value of CRC = 135.0  $\pm$  5.0  $\mu$ M was taken as 100%. (C): Diagram

535 describing positive impact of L-arginine on mean CRC values and elimination of  
536 L-arginine effect by 7-NI, ODQ and KT5823 (KT). All other conditions as at Fig  
537 5. All concentrations are given in  $\mu\text{M}$ . Control value of CRC =  $145.0 \pm 5.0 \mu\text{M}$   
538 was taken as 100%. Data represent mean  $\pm$  S.E. of 4 separate experiments. \* $p <$   
539 0.05 compared to control + PC columns (grey) or to SNP, SNAP or L-arginine  
540 columns (violet).

541

542

543

#### 544 **Control of Mitochondrial Calcium Retention Capacity by L-Arginine**

545 Like to previous example, preincubation of mitochondria with  $20 \mu\text{M}$  PC  
546 diminished CRC by 20% from control value of  $145.0 \pm 5.0$  to  $125.0 \pm 5.5 \mu\text{M}$  (Fig  
547 6B, grey vs. black columns). Preincubation of mitochondria with  $500 \mu\text{M}$  L-  
548 arginine raised CRC value by 56% from  $125 \pm 5.0 \mu\text{M}$  to  $195.0 \pm 9.6 \mu\text{M}$  (Fig 6C,  
549 violet vs. gray columns). The inhibitor of mtNOS 7-NI ( $100 \mu\text{M}$ ) evoked marked  
550 decrease of CRC, which was about two times lower than control value of CRC (Fig  
551 6C, brown vs. gray columns). The inhibitors of GC and PKG (Fig 6C, red and  
552 green columns) also eliminated observed protective effect of L-arginine. High  
553 concentrations of L-arginine ( $2000 \mu\text{M}$ ), like to NO donors, promoted pore  
554 opening by lowering CRC to control values (Fig 6C, light blue vs. gray columns).

555 The data presented at Fig. 6 suggest that low concentrations of L-arginine  
556 and NO-donors produce protective effects, providing marked rise of CRC in

557 comparison with control values. Substantial fall of CRC, observed in the presence  
558 of the inhibitors of mtNOS/PKG-SS, may indicate on the involvement of this  
559 signaling system in the control of MPTP and mitochondrial calcium handling.

560

561

562

## 563 **Discussion**

564 Analyzing known contradictory effects of NO-donors and  
565 intramitochondrial NO on the induction of MPTP by Ca<sup>++</sup> [9-16], we hypothesized  
566 that potential mechanisms of protection cannot be limited only by redox-based  
567 mechanisms. We supposed that calcium-dependent mtNOS/PKG-SS may represent  
568 important part of multi-level system involved in mitochondrial Ca<sup>++</sup> and NO  
569 interplay and MPTP control. Signal transduction in mitochondrial signaling chain:

570 **Ca<sup>++</sup>→mtNOS→NO→mtGC→cGMP→mtPKG,**

571 provides functional dependence of mitochondrial PKG (mtPKG) activity on  
572 intramitochondrial Ca<sup>++</sup> concentration. Transmission of calcium signal to final  
573 mediator mtPKG may create at least two feedforward loops, which might involve  
574 phosphorylation of some key proteins by mtPKG. Positive feedforward loop may  
575 ensure the activation of mitochondrial oxidative phosphorylation, while negative  
576 feedforward loop might oppose MPTP opening induced by Ca<sup>++</sup> load.

577 MPTP is considered as common death pathway to the development of  
578 apoptosis and necrosis observed at ischemia-reperfusion [37-42], acute

579 steatohepatitis [31, 39, 43], action of various drugs and toxins [39, 44], etc. Calcium  
580 and reactive oxygen species are recognized as key mediators involved in MPTP  
581 opening and cell death [39, 40]. However, besides rise of  $\text{Ca}^{++}$  and reactive oxygen  
582 species, ischemia/reperfusion and some other pathological processes are  
583 characterized by the accumulation and efflux from damaged cells of long chain  
584 fatty acids (LCFA) [45-47] and their carnitine derivatives [45]. The accumulation  
585 of these primary "toxins" is considered as one of triggering events evoking  
586 mitochondrial calcium overload and oxidative stress [39, 47, 48]. LCFA and long  
587 chain acyl carnitines are oxidized in form of long chain acyl-CoA's, which known  
588 to inhibit various NAD(P)H-dependent dehydrogenases [49-51]. However,  
589 molecular mechanisms providing the involvement of long chain acyl-CoA's in the  
590 induction of MPTP are far from being clear and require further investigations. Our  
591 preliminary results indicate that PC induces CsA-dependent dissipation of  $\Delta\Psi_m$ ,  
592 which may be prevented by NO-donor SNAP [16]. Therefore, in the present study  
593 we used calcium and PC overload to induce MPTP opening.

594         To investigate quantitatively the impact of mtNOS/PKG1-SS on MPTP  
595 opening, we selected mean threshold values for  $\text{Ca}^{++}$  (CRC) and PC (PC\*) as  
596 regulatory parameters, characterizing the sensitivity of MPTP to  $\text{Ca}^{++}$  and PC  
597 overload. Besides that, to evaluate the involvement of mtNOS/PKG-SS in the  
598 regulation of mitochondrial respiration, we determined mean values of steady state  
599 respiration rates  $\text{VO}_{2\text{ss}}$ . Hexokinase plus ADP were applied to set  $\text{VO}_{2\text{ss}}$  at 80-  
600 90% of State3 respiration rate. Pyruvate and L-glutamate were selected as

601 substrates to keep balanced turnover of both spans of the Krebs cycle and provide  
602 sufficient production of NADPH and GTP, the cofactors required for  
603 mtNOS/PKG-SS operation.

604         Obtained results indicate that NO-donors (SNP, SNAP) and L-arginine  
605 produce bidirectional concentration-dependent effects on mitochondrial respiration  
606 and on MPTP opening evoked by calcium and PC excess. In low concentrations  
607 NO-donors (10-50  $\mu$ M) and L-arginine (10- 200  $\mu$ M) cause moderate activation of  
608 steady state respiration by increasing  $VO_{2ss}$  on 30-40 % (Fig 2A and 2B; black vs.  
609 gray columns). Besides that, NO-donors and L-arginine suppress the dissipation of  
610  $\Delta\Psi_m$  and MPTP opening by raising the values of two regulatory parameters (CRC  
611 and  $PC^*$ ), characterizing MPTP sensitivity to calcium and PC load. Low  
612 concentrations of NO-donors (to 50  $\mu$ M) and L-arginine (to 500  $\mu$ M) enlarge  
613 threshold values of  $PC^*$  and CRC by 60-100% (Fig 5B and 5C, 6B and 6C; violet  
614 vs. gray columns).

615         Application of the inhibitors of NOS, GC and PKG eliminated both effects,  
616 what reveal the involvement of mtNOS/PKG-SS in the activation of respiration  
617 (Fig 2, hatched vs. first black columns) and deceleration of MPTP opening (Fig 5  
618 and 6, green and red vs. violet columns). Mitochondrial PKG may act as final  
619 mediator involved in the activation of respiration and MPTP control. PKG may  
620 operate like PKA, which is known to activate mitochondrial oxidative  
621 phosphorylation by phosphorylating the cytochromes of respiratory chain [33- 36].  
622 However, in comparison to PKA action, the activation of mitochondrial respiration

623 by PKG could reinforce the regulation of oxidative phosphorylation by calcium, by  
624 balancing the effect of direct activation of key dehydrogenases of the Krebs cycle  
625 by calcium ions [8].

626 In high concentrations L-arginine (above 500  $\mu\text{M}$ ) and NO-donors (above  
627 100  $\mu\text{M}$ ) produce opposite action, by inhibiting mitochondrial respiration (Fig 1A  
628 and 2) and promoting MPTP opening (Fig 5B and 5C, 6B and 6C; blue vs. violet  
629 columns). This alteration in the direction of their effects may indicate on opposite  
630 impact of NO and mtNOS/PKG-SS on both processes. Apparently, overproduction  
631 of mitochondrial NO, resulting in subsequent inhibition of mitochondrial  
632 respiratory chain and of other related systems, may overcome positive effects  
633 provided by mtNOS/PKGSS (i.e. by mtPKG).

634 Another example, illustrating the involvement of mtNOS/PKG-SS in the  
635 control of MPTP, is presented at Fig 4. This example demonstrates that protection  
636 afforded by L-arginine depends on the types of substrates used. Fig 4A shows that  
637 200  $\mu\text{M}$  L-arginine prevents the dissipation of  $\Delta\Psi\text{m}$  by PC excess in mitochondria  
638 respiring on L-glutamate and pyruvate (green vs. black lines). This effect is  
639 abrogated by PKG inhibitor KT5823 (red lines). However, in mitochondria  
640 respiring on succinate plus rotenone at PC excess, protection provided by L-  
641 arginine cannot be realized (Fig. 4B, green vs. black lines). Observed difference of  
642 L-arginine effects may be explained by the fact that in the last case the Krebs cycle  
643 and substrate-level phosphorylation are not functioning and mitochondrial

644 oxidative phosphorylation cannot keep appropriate level of GTP required for  
645 cGMP production and activation of PKG.

646 It is worth to note that mtNOS/PKG-SS cannot be considered as redundant  
647 element in multi level control of oxidative phosphorylation and MPTP. Being  
648 calcium-dependent, this signaling system may be involved in the functioning of  
649 several feedback and feedforward regulatory mechanisms, two of which are more  
650 obvious and directed on the activation of mitochondrial respiration and MPTP  
651 control. In this case mitochondrial PKG, along with cytosolic PKG1, might be  
652 considered as final mediator of protection involved in MPTP control.

653 It is well known that dozens of kinases and phosphatases are translocated to  
654 and localized in mitochondria [52, 53] and part of them are having as the targets  
655 structural (or functional) components of MPTP complex [31, 41]. However, direct  
656 evidence of PKG and GC translocation into mitochondria remains to be open  
657 question.

658

659

660

## 661 **Acknowledgments**

662 Authors thank Mary Simonova, Milija Galimova and Alex Sergeev for  
663 technical support.

664

665

## 666 **References**

- 667 1. Cleeter MW, Cooper JM, Darley-USmar VM, Moncada S, Schapira AH.  
668 Reversible inhibition of cytochrome c oxidase, the terminal enzyme of the  
669 mitochondrial respiratory chain, by nitric oxide Implications for  
670 neurodegenerative diseases. FEBS Lett. 1994; 345(1):50-4 DOI:  
671 101016/0014-5793(94)00424-2
- 672 2. Giulivi C. Functional implications of nitric oxide produced by mitochondria  
673 in mitochondrial metabolism. Biochem J. 1998; 332:673–679. PMID:  
674 9620869
- 675 3. Brown GC. Regulation of mitochondrial respiration by nitric oxide  
676 inhibition of cytochrome c oxidase. Biochimica et Biophysica Acta. 2001;  
677 1504 (1):46-57. doiorg/101016/S0005-2728(00)00238-3
- 678 4. Parihara MS, Nazarewicz RR, Kincaida EU, Bringoldb U, Ghafourifara P.  
679 Association of mitochondrial nitric oxide synthase activity with respiratory  
680 chain complex I. Biochem Biophys Res Commun. 2008; 366(1):23–28.  
681 DOI: 101016/jbbrc200711056
- 682 5. Giulivi C, Kato K, Cooper CE. Nitric oxide regulation of mitochondrial  
683 oxygen consumption I: cellular physiology. Am J Physiol Cell Physiol.  
684 2006; 291(6): C1225-31. DOI:101152/ajpcell003072006
- 685 6. Palacios-Callender M, Hollis V, Frakich N, Mateo J, Moncada S.  
686 Cytochrome c oxidase maintains mitochondrial respiration during partial



- 687 inhibition by nitric oxide. *J Cell Sci.* 2007; 120(Pt 1):160-5.  
688 DOI:101242/jcs03308
- 689 7. Rodríguez-Juárez F, Aguirre E, Cadenas S. Relative sensitivity of soluble  
690 guanylate cyclase and mitochondrial respiration to endogenous nitric oxide  
691 at physiological oxygen concentration. *Biochem J.* 2007; 405:223–231.  
692 doi:101042/BJ20070033
- 693 8. Traaseth N, Elfering S, Solien J, Haynes V, Giulivi C. Role of calcium  
694 signaling in the activation of mitochondrial nitric oxide synthase and citric  
695 acid cycle. *Biochim Biophys Acta.* 2004; 1658(1-2):64-71.  
696 DOI:101016/jbbabio200404015
- 697 9. Ghafourifar P, Schenk U, Klein SD, Richter C. Mitochondrial nitric-oxide  
698 synthase stimulation causes cytochrome c release from isolated  
699 mitochondria. Evidence for intramitochondrial peroxynitrite formation. *J*  
700 *Biol Chem.* 1999; 274(44):31185-8. doi: 101074/jbc2744431185 PMID  
701 10531311
- 702 10. Brookes PS, Salinas EP, Darley-USmar K, Eiserich JP, Freeman BA, et al.  
703 Concentration-dependent effects of nitric oxide on mitochondrial  
704 permeability transition and cytochrome c release. *J Biol Chem.* 2000; 275  
705 (27):20474–20479. DOI 101074/jbcM001077200
- 706 11. Dedkova EN, Blatter LA. Modulation of mitochondrial Ca<sup>2+</sup> by nitric oxide  
707 in cultured bovine vascular endothelial cells. *Am J Physiol Cell Physiol.*  
708 2005; 289(4):C836-45. PMID: 15901603. DOI:101152/ajpcell000112005

- 709 12. Dedkova EN, Blatter LA. Characteristics and function of cardiac  
710 mitochondrial nitric oxide synthase. *J Physiol.* 2009); 587(4):851–872. DOI:  
711 101113/jphysiol2008165423
- 712 13. Davidson SM, Duchen MR. Effects of NO on mitochondrial function in  
713 cardiomyocytes: Pathophysiological relevance. *Cardiovasc Res.* 2006;  
714 71(1):10-21. PMID:16515774 DOI:101016/jcardiores200601019
- 715 14. Leite AC, Oliveira HC, Utino FL, Garcia R, Alberici LC, Fernandes MP, et  
716 al. Mitochondria generated nitric oxide protects against permeability  
717 transition via formation of membrane protein S-nitrosothiols. *Biochim*  
718 *Biophys Acta.* 2010;1797(6-7):1210-6. doi: 101016/jbbabio201001034
- 719 15. Akopova O, Kotsiuruba A, Korkach Y, Kolchinskaya L, Nosar V, et al. The  
720 effect of NO donor on calcium uptake and reactive nitrogen species  
721 production in mitochondria. *Cell Physiol Biochem.* 2016; 39(1):193-204.  
722 doi: 101159/000445616
- 723 16. Grishina EV, Galimova MH, Djafarov RH, Sergeev AI, Fedotcheva NI,  
724 Dynnik VV. Induction of cyclosporine-sensitive mitochondrial  
725 permeability transition pore by substrates forming acetyl-CoA under  
726 normal conditions and in type 2 diabetes. *Biochemistry (Moscow)*  
727 *Supplement Series A:Membrane and Cell Biology.* 2016; 10(1):11–18.  
728 DOI: 101134/S1990747815050049

- 729 17. Piantadosi CA. Regulation of mitochondrial processes by protein S-  
730 nitrosylation. *Biochim Biophys Acta*. 2012; 1820(6):712-21. doi:  
731 101016/jbbagen201103008
- 732 18. Chang AH, Sancheti H, Garcia J, Kaplowitz N, Cadenas E, Han D.  
733 Respiratory substrates regulate S-nitrosylation of mitochondrial proteins  
734 through a thiol-dependent pathway. *Chem Res Toxicol*. 2014; 27(5):794-  
735 804. doi: 101021/tx400462r
- 736 19. Queiroga CS, Almeida AS, Martel C, Brenner C, Alves PM, Vieira HL.  
737 Glutathionylation of adenine nucleotide translocase induced by carbon  
738 monoxide prevents mitochondrial membrane permeabilization and  
739 apoptosis. *J Biol Chem*. 2010; 285(22):17077-88. doi:  
740 101074/jbcM109065052
- 741 20. Yap LP, Garcia JV, Han DS, Cadenas E. Role of nitric oxide-mediated  
742 glutathionylation in neuronal function: potential regulation of energy  
743 utilization. *Biochem J*. 2010; 428(1):85-93. doi: 101042/BJ20100164
- 744 21. Mailloux RJ, Willmore WG. S-glutathionylation reactions in mitochondrial  
745 function and disease. *Front Cell Dev Biol*. 2014; 2:68. doi:  
746 103389/fcell201400068 eCollection 2014
- 747 22. Mailloux RJ, Treberg JR. Protein S-glutathionylation links energy  
748 metabolism to redox signaling in mitochondria. *Redox Biol*. 2016; 8:110-8.  
749 doi: 101016/jredox201512010

- 750 23. Seya K, Ono K, Fujisawa S, Okumura K, Motomura S, Furukawa K.  
751 Cytosolic Ca<sup>2+</sup>-induced apoptosis in rat cardiomyocytes via mitochondrial  
752 NO-cGMP-protein kinase G pathway. *J Pharmacol Exp Ther.* 2013;  
753 344(1):77-84. doi: 101124/jpet112198176
- 754 24. Seya K, Motomura S, Furukawa K. Cardiac mitochondrial cGMP stimulates  
755 cytochrome c release. *Clin Sci (Lond).* 2007; 112(2):113-21.  
756 doi:101042/CS20060144
- 757 25. Acin-Perez R, Russwurm M, Günnewig K, Gertz M, Zoidl G, et al. A  
758 phosphodiesterase 2A isoform localized to mitochondria regulates  
759 respiration. *J Biol Chem.* 2011; 286(35):30423-32. doi:  
760 101074/jbcM111266379
- 761 26. Schlossmann J, Feil R, Hofmann F. Signaling through NO and cGMP-  
762 dependent protein kinases. *Ann Med.* 2003;35(1):21-7. Review.  
763 PMID:12693609
- 764 27. Francis SH, Busch JL, Corbin JD. cGMP-dependent protein kinases and  
765 cGMP phosphodiesterases in nitric oxide and cGMP action. *Pharmacol Rev.*  
766 2010; 62:525–563. doi:101124/pr110002907
- 767 28. Pfeifer A, Kilić A, Hoffmann LS. Regulation of metabolism by cGMP.  
768 *Pharmacol Ther.* 2013; 140:81-91. doi: 101016/jpharmthera201306001
- 769 29. Inserte J, Garcia-Dorado D. The cGMP/PKG pathway as a common  
770 mediator of cardioprotection: translatability and mechanism. *British Journal*  
771 *of Pharmacology.* 2015; 172:1996–2009. DOI:101111/bph12959

- 772 30. Tengan CH, Moraes CT. NO control of mitochondrial function in normal  
773 and transformed cells. *Biochimica et Biophysica Acta*. 2017; 1858:573–  
774 581. doi.org/10.1016/j.bbabbio.2017.02.009
- 775 31. Martel C, Huynh LH, Garnier A, Ventura-Clapier R, Brenner R. Inhibition  
776 of the mitochondrial permeability transition for cytoprotection: direct versus  
777 indirect mechanisms. *Biochemistry Research International*. Volume 2012  
778 (2012), Article ID 213403, 13 pages doi:101155/2012/213403
- 779 32. Fraser M, Chan SL, Chan SS, Fiscus RR, Tsang BK. Regulation of p53 and  
780 suppression of apoptosis by the soluble guanylyl cyclase/cGMP pathway in  
781 human ovarian cancer cells. *Oncogene*. 2006; 25(15):2203-12.  
782 DOI:101038/sjonc1209251
- 783 33. Sardanelli AM, Technikova-Dobrova Z, Scacco SC, Speranza F, Papa S.  
784 Characterization of proteins phosphorylated by the cAMP-dependent protein  
785 kinase of bovine heart mitochondria. *FEBS Lett*. 1995; 377(3):470-4.  
786 DOI:101016/0014-5793(95)01407-1
- 787 34. Acin-Perez R, Gatti DL, Bai Y, Manfredi G. Protein phosphorylation and  
788 prevention of cytochrome oxidase inhibition by ATP: coupled mechanisms  
789 of energy metabolism regulation. *Cell Metab*. 2011; 13(6):712-9. doi:  
790 101016/jcmet201103024
- 791 35. Di Benedetto G, Pendin D, Greotti E, Pizzo P, Pozzan T. Ca<sup>2+</sup> and cAMP  
792 cross-talk in mitochondria. *J Physiol*. 2014; 592(2):305-12. doi:  
793 101113/jphysiol2013259135

- 794 36. Ould Amer Y, Hebert-Chatelain E. Mitochondrial cAMP-PKA signaling:  
795 What do we really know? *Biochim Biophys Acta*. 2018; 1859(9):868-877.  
796 doi: 101016/j.bbabbio201804005
- 797 37. Giorgio V, Guo L, Bassot C, Petronilli V, Bernardi P. Calcium and  
798 regulation of the mitochondrial permeability transition. *Cell Calcium*. 2018;  
799 70:56–63. DOI:10.1016/j.ceca.2017.05.004
- 800 38. Burley DS, Ferdinandy P, Baxter GF. Cyclic GMP and protein kinase-G in  
801 myocardial ischaemia-reperfusion: opportunities and obstacles for survival  
802 signaling. *Br J Pharmacol*. 2007; 152(6):855-69. doi:101038/sbjbp0707409
- 803 39. Lemasters JJ, Theruvath TP, Zhong Z, Nieminen AL. Mitochondrial  
804 Calcium and the Permeability Transition in Cell Death. *Biochim Biophys*  
805 *Acta*. 2009; 1787:1395-1401. DOI:101016/j.bbabbio200906009
- 806 40. Halestrap AP. A pore way to die: the role of mitochondria in reperfusion  
807 injury and cardioprotection. *Biochem Soc Trans*. 2010; 38(4):841-60.  
808 DOI:101042/BST0380841
- 809 41. Izzo V, Bravo-San Pedro JM, Sica V, Kroemer G, Galluzzi L. Mitochondrial  
810 Permeability Transition: New Findings and Persisting Uncertainties. *Trends*  
811 *in Cell Biology*. 2016; 26 (9):655-67. DOI:10.1016/j.tcb.2016.04.006
- 812 42. Borutaite V, Morkuniene R, Arandarcikaite O, Jekabsone A, Barauskaite J,  
813 Brown GC. Nitric oxide protects the heart from ischemia-induced apoptosis  
814 and mitochondrial damage via protein kinase G mediated blockage of

- 815 permeability transition and cytochrome c release. *J Biomed Sci.* 2009; 16  
816 (1):70. doi: 101186/1423-0127-16-70
- 817 43. Begriche K, Igoudjil A, Pessayre D, Fromenty B. Mitochondrial dysfunction  
818 in NASH: causes, consequences and possible means to prevent it.  
819 *Mitochondrion.* 2006; 6(1):1-28. DOI:101016/jmito200510004
- 820 44. Mukherjee R, Mareninova OA, Odinkova IV, Huang W, Murphy J, et al.  
821 Mechanism of mitochondrial permeability transition pore induction and  
822 damage in the pancreas: inhibition prevents acute pancreatitis by protecting  
823 production of ATP. *Gut.* 2016; 65(8):1333-46. doi: 101136/gutjnl-2014-  
824 308553
- 825 45. Yamada KA, McHowat J, Yan GX, Donahue K, Peirick J, et al. Cellular  
826 uncoupling induced by accumulation of long-chain acylcarnitine during  
827 ischemia. *Circ Res.* 1994; 74(1):83-95. <https://doi.org/101161/01RES74183>
- 828 46. De Windt LJ, Willems J, Roemen TH, Coumans WA, Reneman RS, et al.  
829 Ischemic-reperfused isolated working mouse hearts: membrane damage and  
830 type IIA phospholipase A2. *Am J Physiol Heart Circ Physiol.* 2001;  
831 280(6):H2572-80. DOI: 101152/ajpheart20012806H2572
- 832 47. Phillis JW, Diaz FG, O'Regan MH, Pilitsis JG. Effects of  
833 immunosuppressants, calcineurin inhibition, and blockade of endoplasmic  
834 reticulum calcium channels on free fatty acid efflux from the  
835 ischemic/reperfused rat cerebral cortex. *Brain Res.* 2002; 957(1):12-24.  
836 [https://doi.org/101016/S0006-8993\(02\)03578-3](https://doi.org/101016/S0006-8993(02)03578-3)

- 837 48. Penzo D, Tagliapietra C, Colonna R, Petronilli V, Bernardi P. Effects of  
838 fatty acids on mitochondria: implications for cell death. *Biochim Biophys*  
839 *Acta*. 2002; 1555(1-3):160-5. [https://doi.org/10.1016/S0005-2728\(02\)00272-4](https://doi.org/10.1016/S0005-2728(02)00272-4)
- 840 49. Erfle JD, Sauer F. The inhibitory effects of acyl-coenzyme A esters on the  
841 pyruvate and alpha-oxoglutarate dehydrogenase complexes. *Biochim*  
842 *Biophys Acta*. 1969;178(3):441-5253. DOI: 101016/0005-2744(69)90213-7
- 843 50. Lai JC, Cooper AJ. Neurotoxicity of ammonia and fatty acids: Differential  
844 inhibition of mitochondrial dehydrogenases by ammonia and fatty acyl  
845 coenzyme A derivatives. *Neurochem Res*. 1991; 16 (7):795–803.  
846 PMID:1944769
- 847 51. Farrell HM, Wickham ED, Reeves HC. Effects of long-chain acyl-coenzyme  
848 A's on the activity of the soluble form of nicotinamide adenine dinucleotide  
849 phosphate-specific isocitrate dehydrogenase from lactating bovine mammary  
850 gland. *Arch Biochem Biophys*. 1995; 321(1):199-208.  
851 DOI:101006/abbi19951386
- 852 52. Su CC, Yang JY, Leu HB, Chen Y, Wang PH. Mitochondrial Akt-regulated  
853 mitochondrial apoptosis signaling in cardiac muscle cells. *Am J Physiol*  
854 *Heart Circ Physiol*. 2012; 302(3):H716-23. doi: 101152/ajpheart004552011
- 855 53. Lim S, Smith KR, Lim ST, Tian R, Lu J, Tan M. Regulation of  
856 mitochondrial functions by protein phosphorylation and dephosphorylation.  
857 *Cell Biosci*. 2016; 6:25. doi:10.1186/s13578-016-0089-3



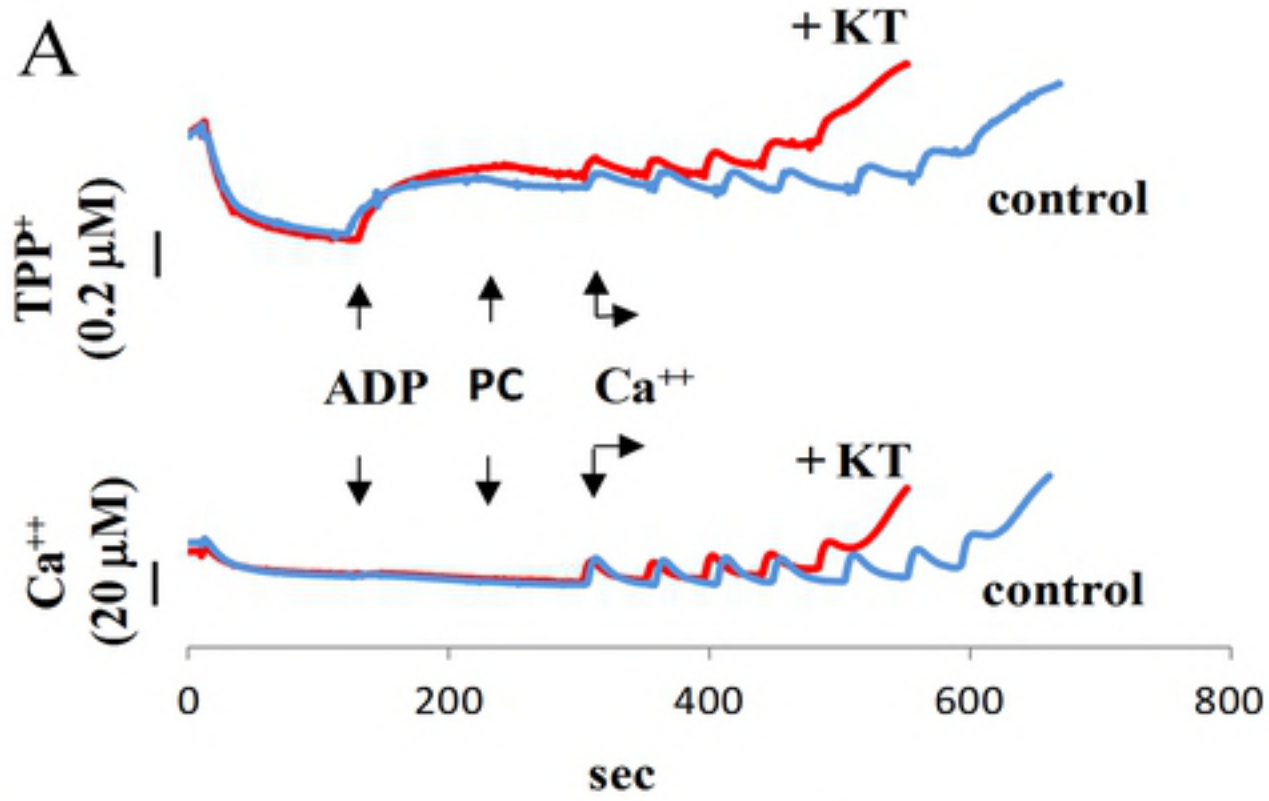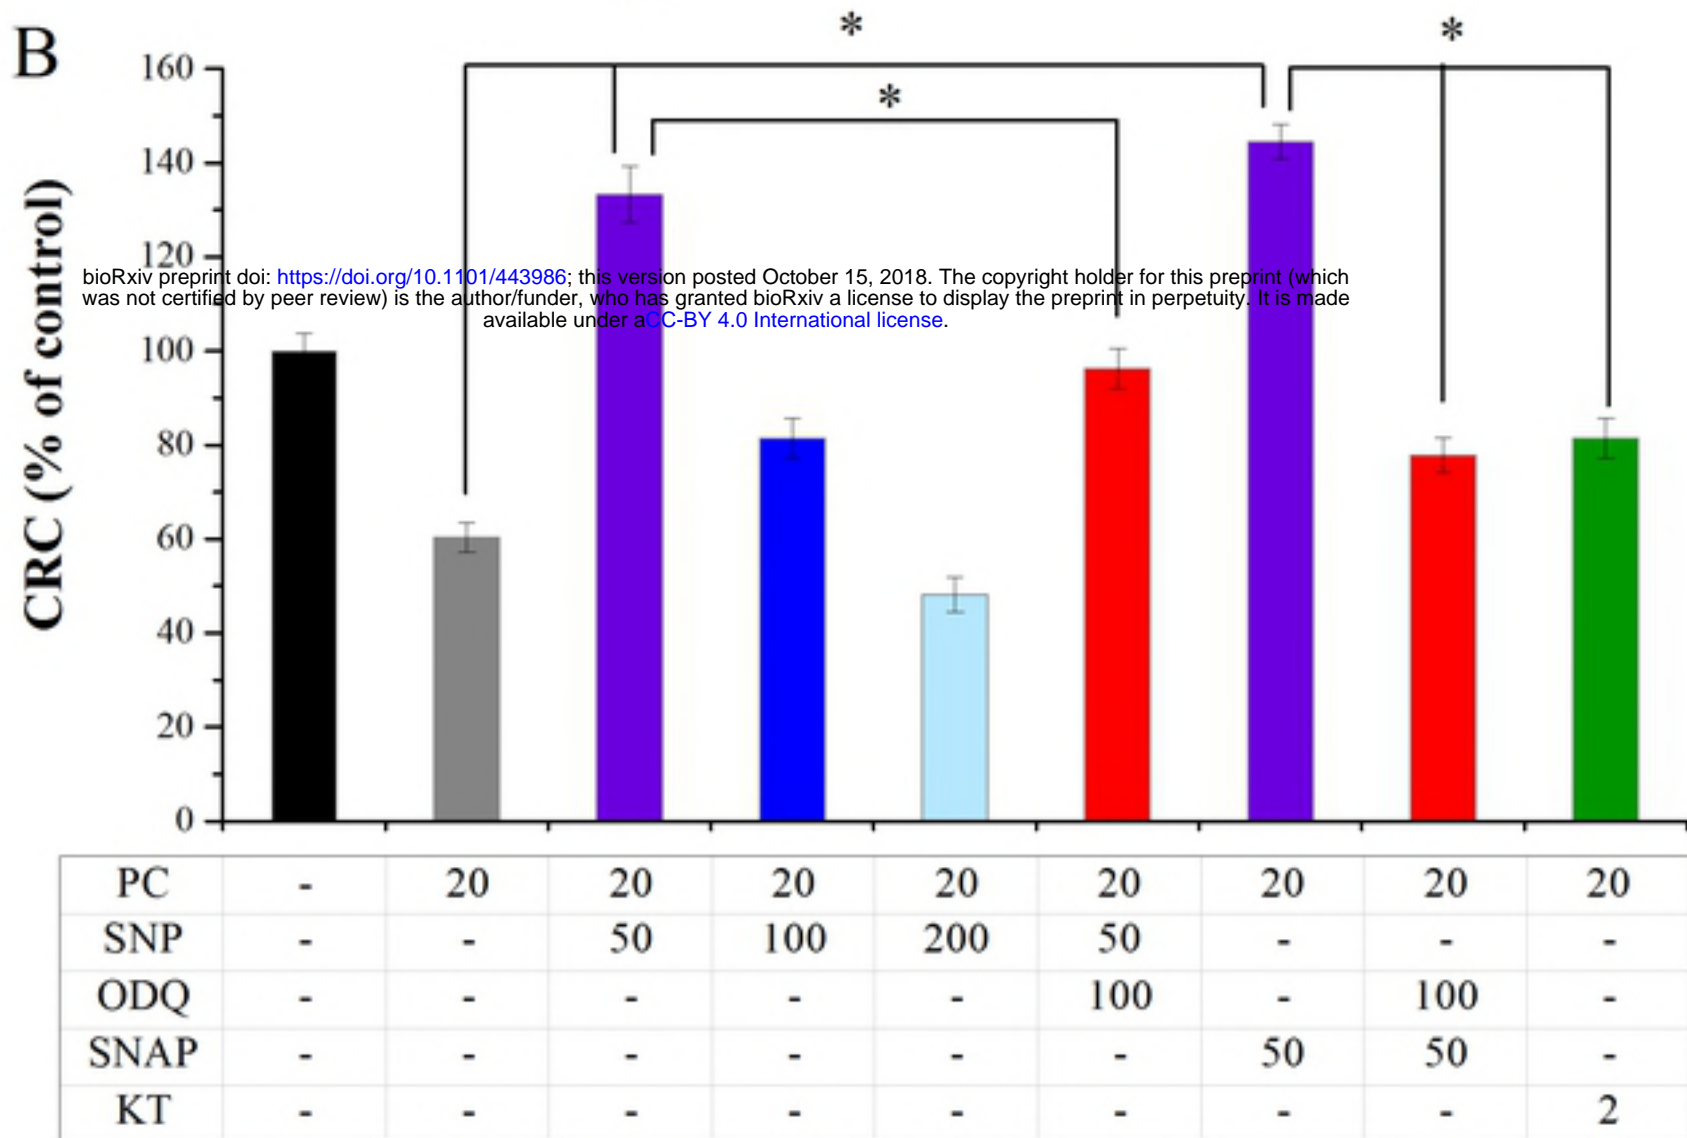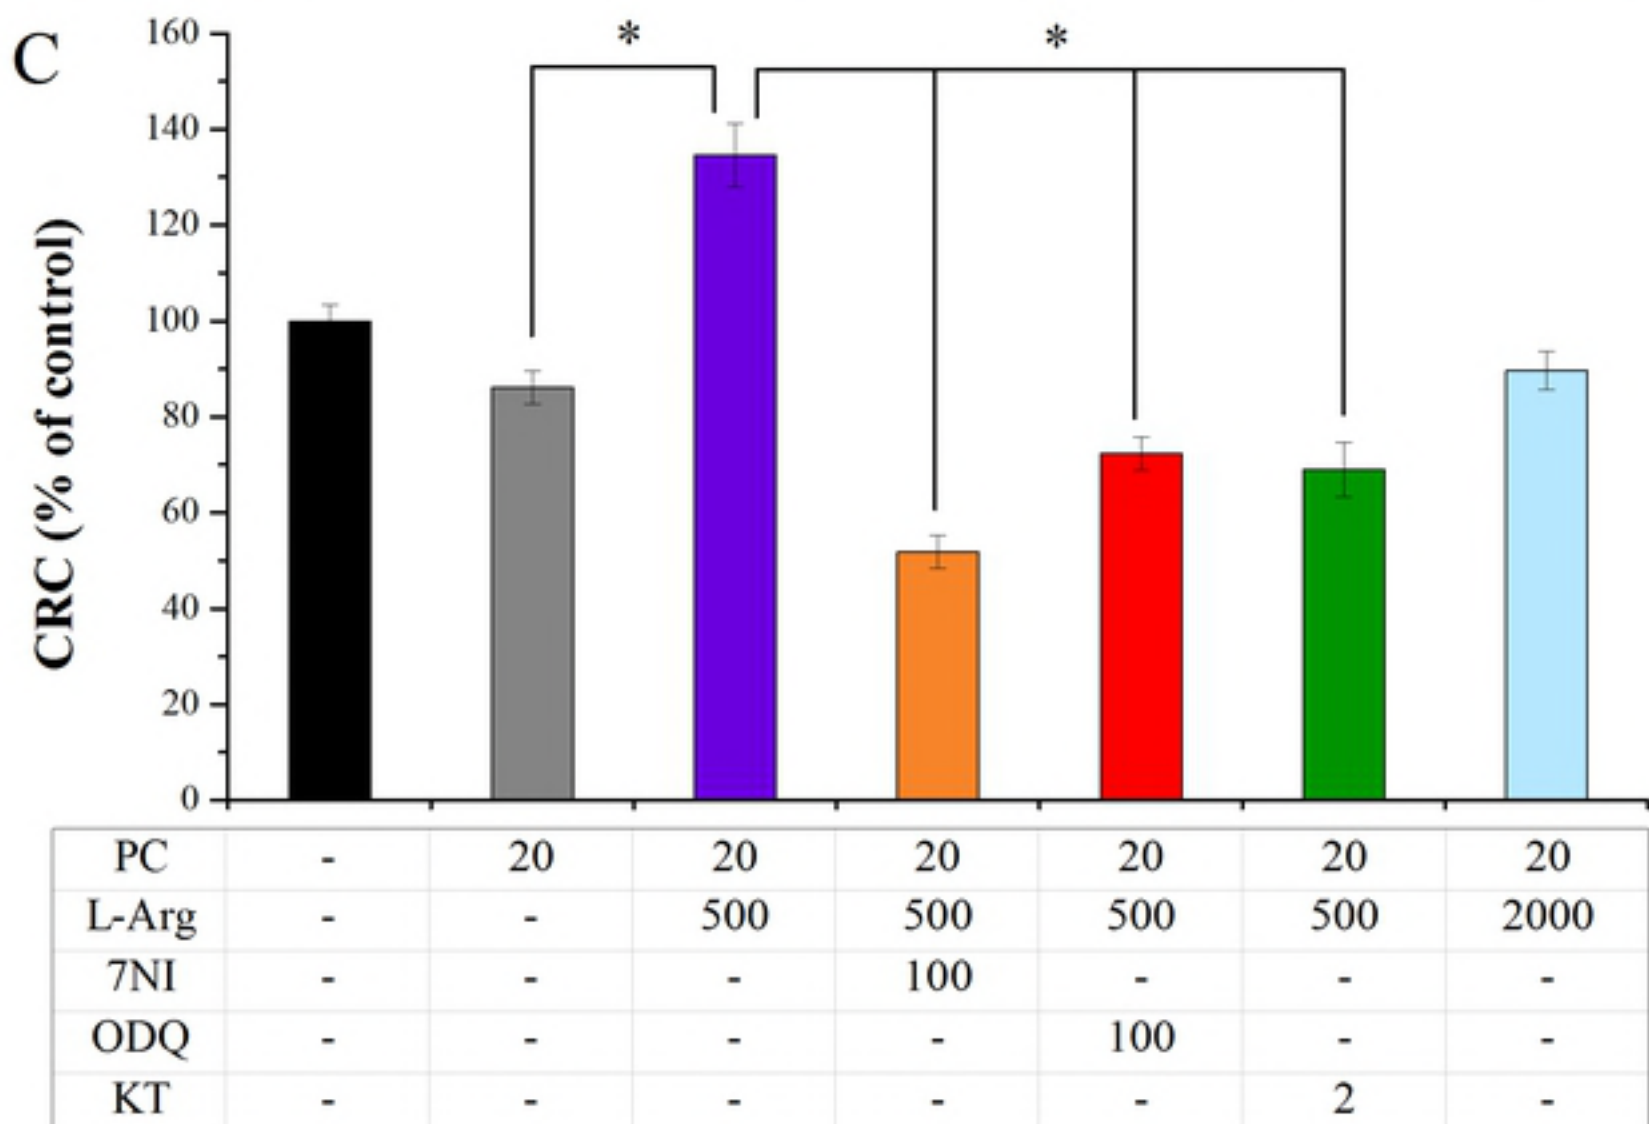

Fig6

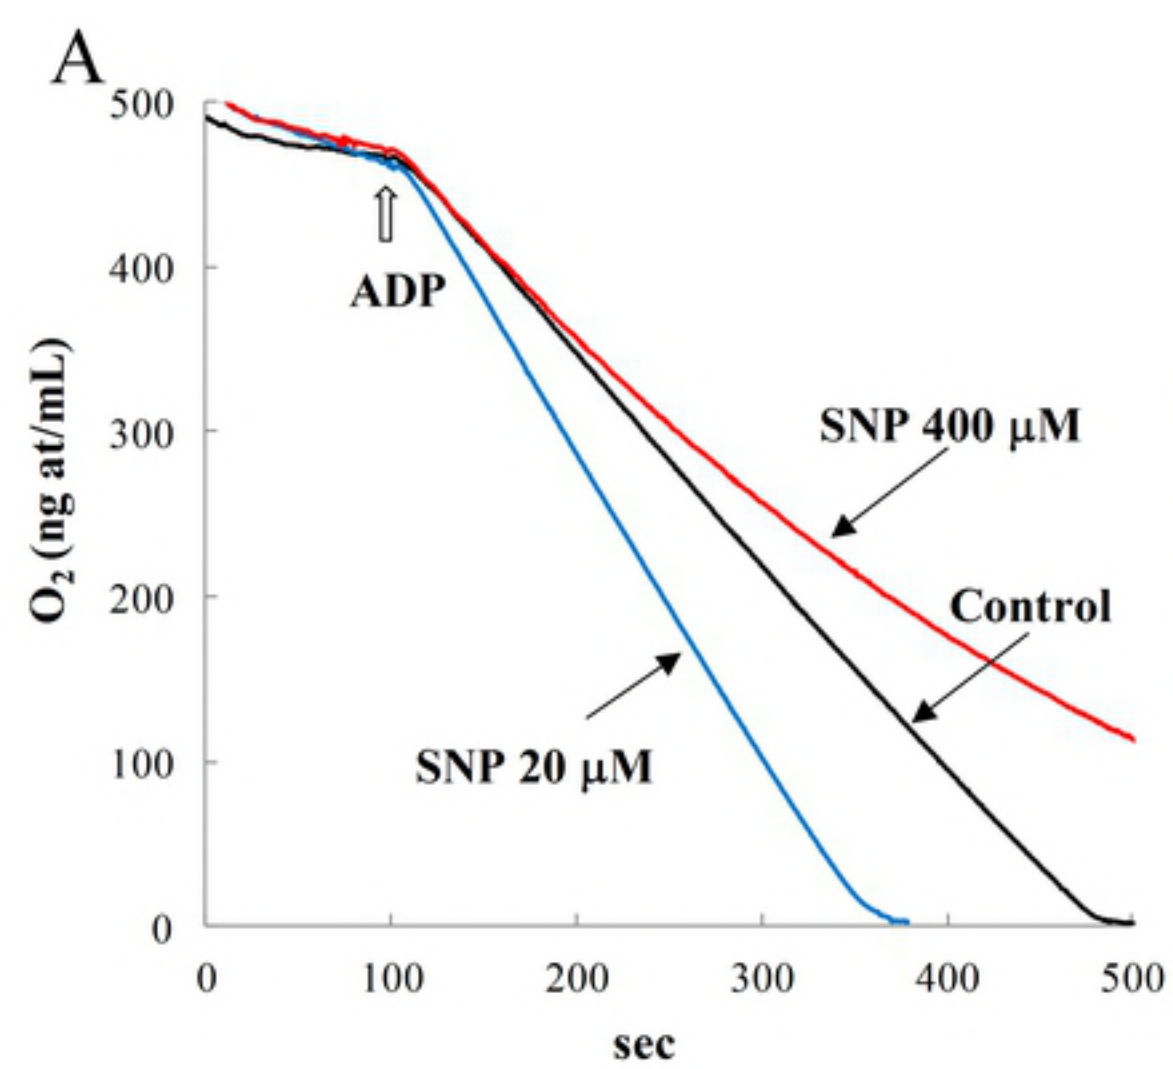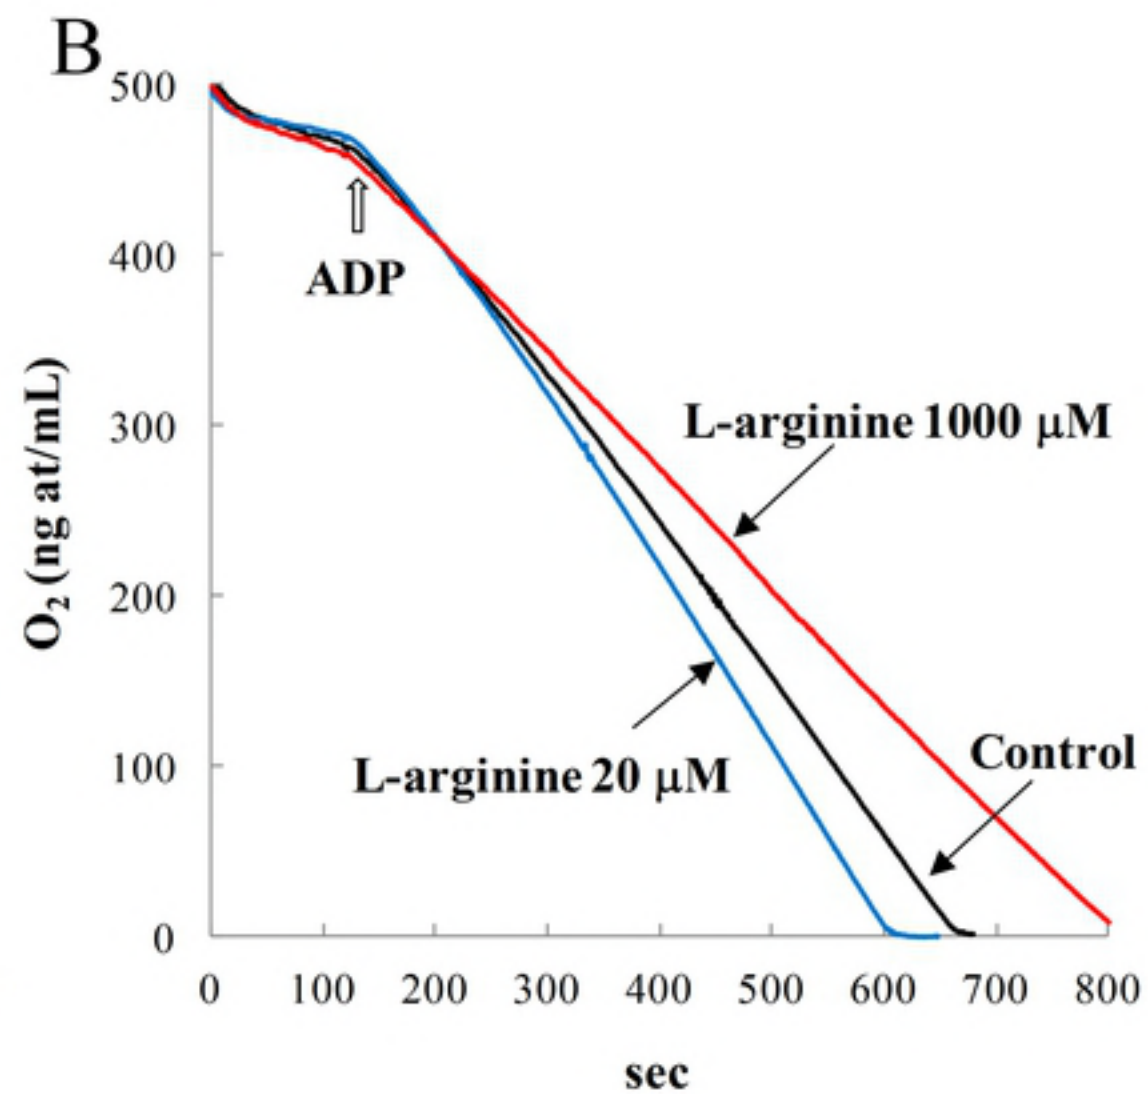

Fig1

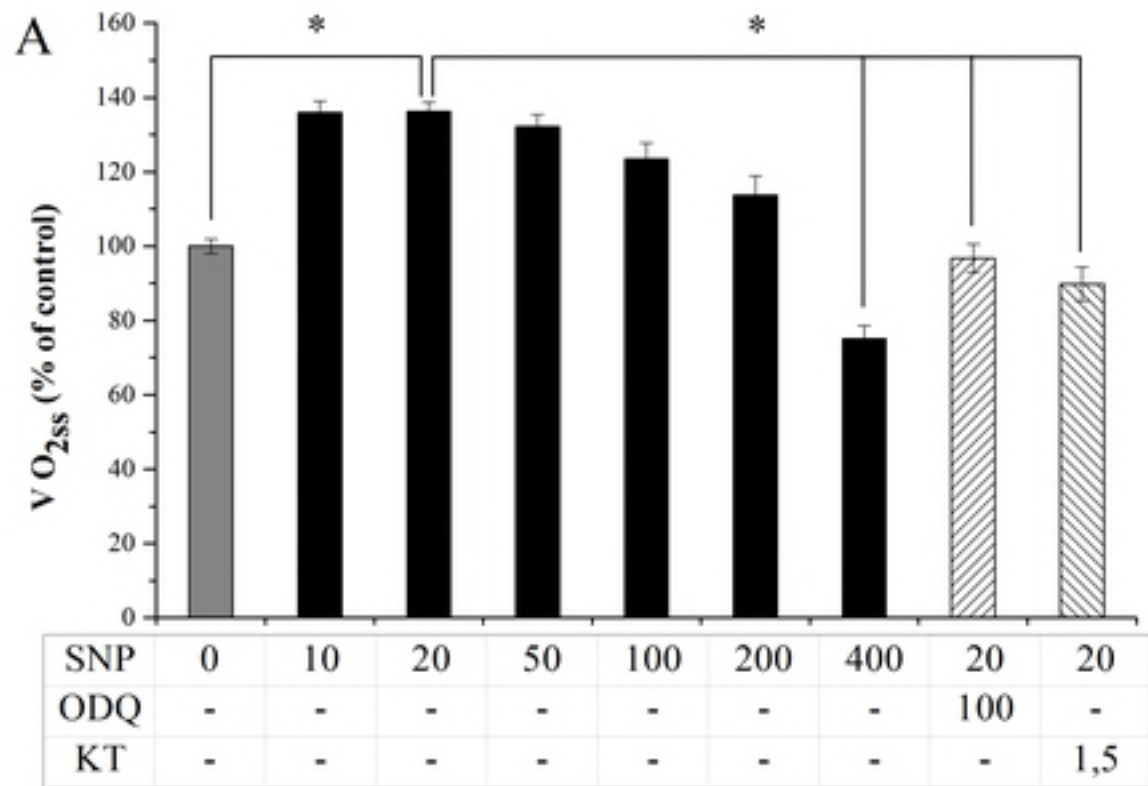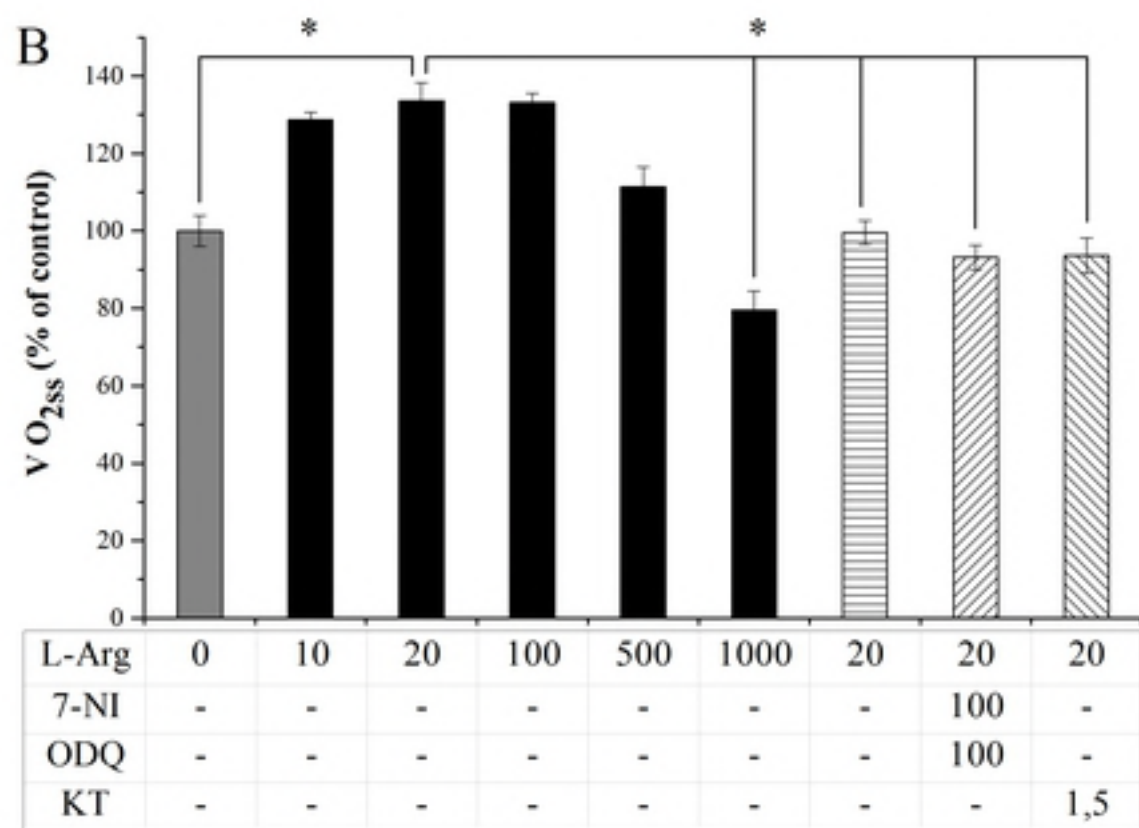

Fig2

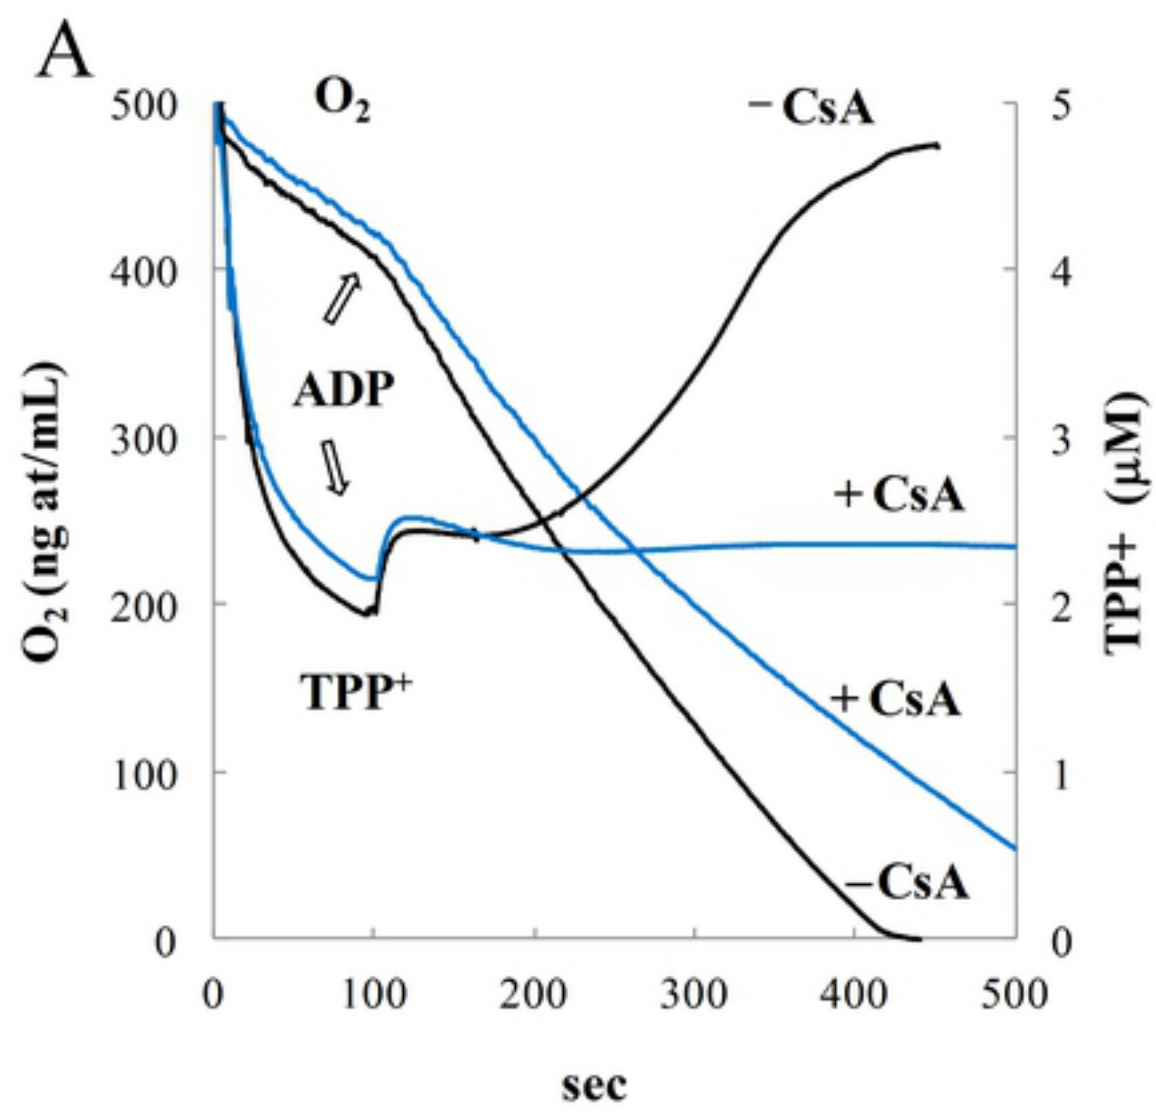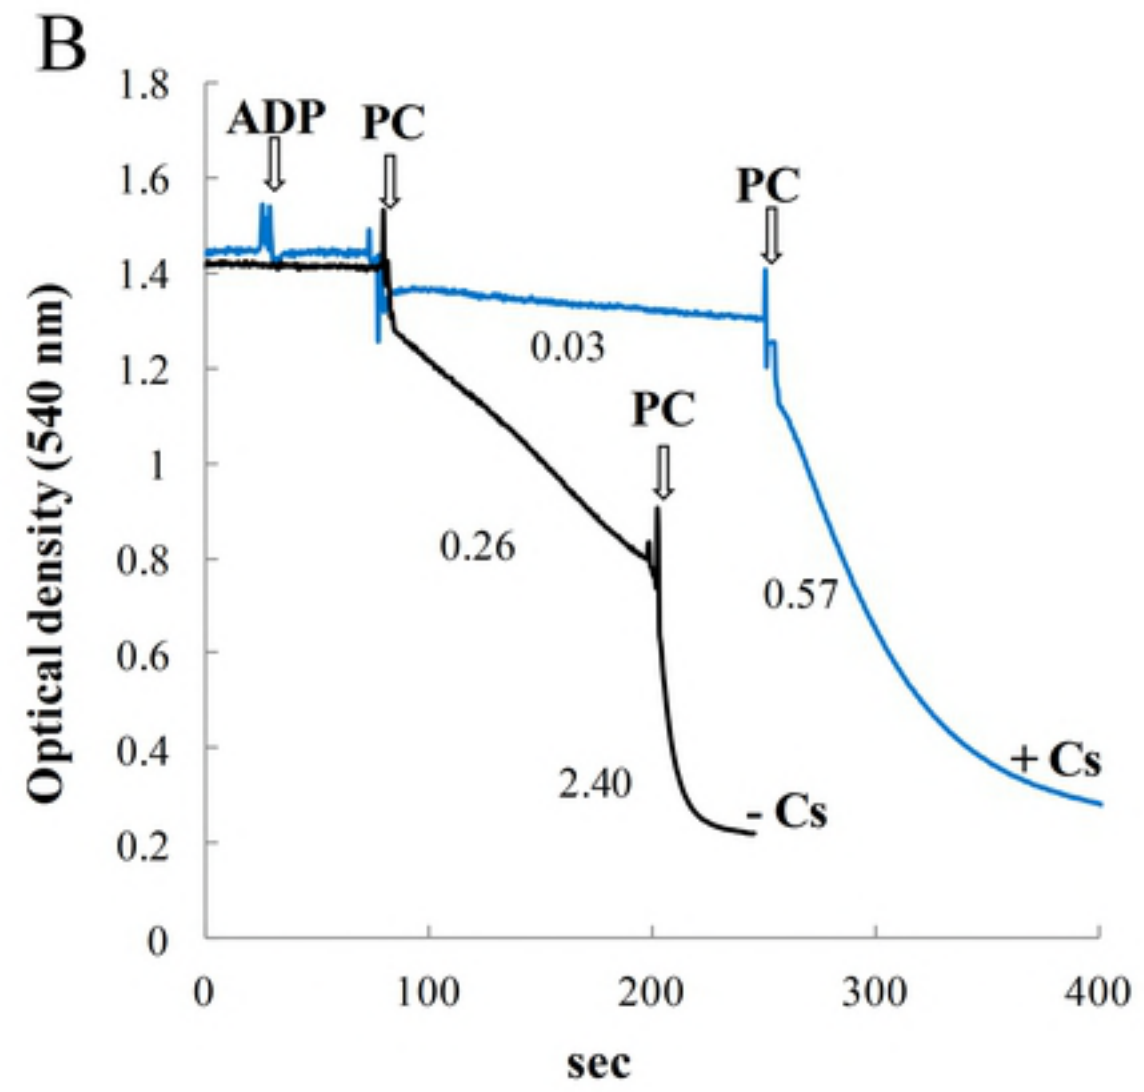

Fig3

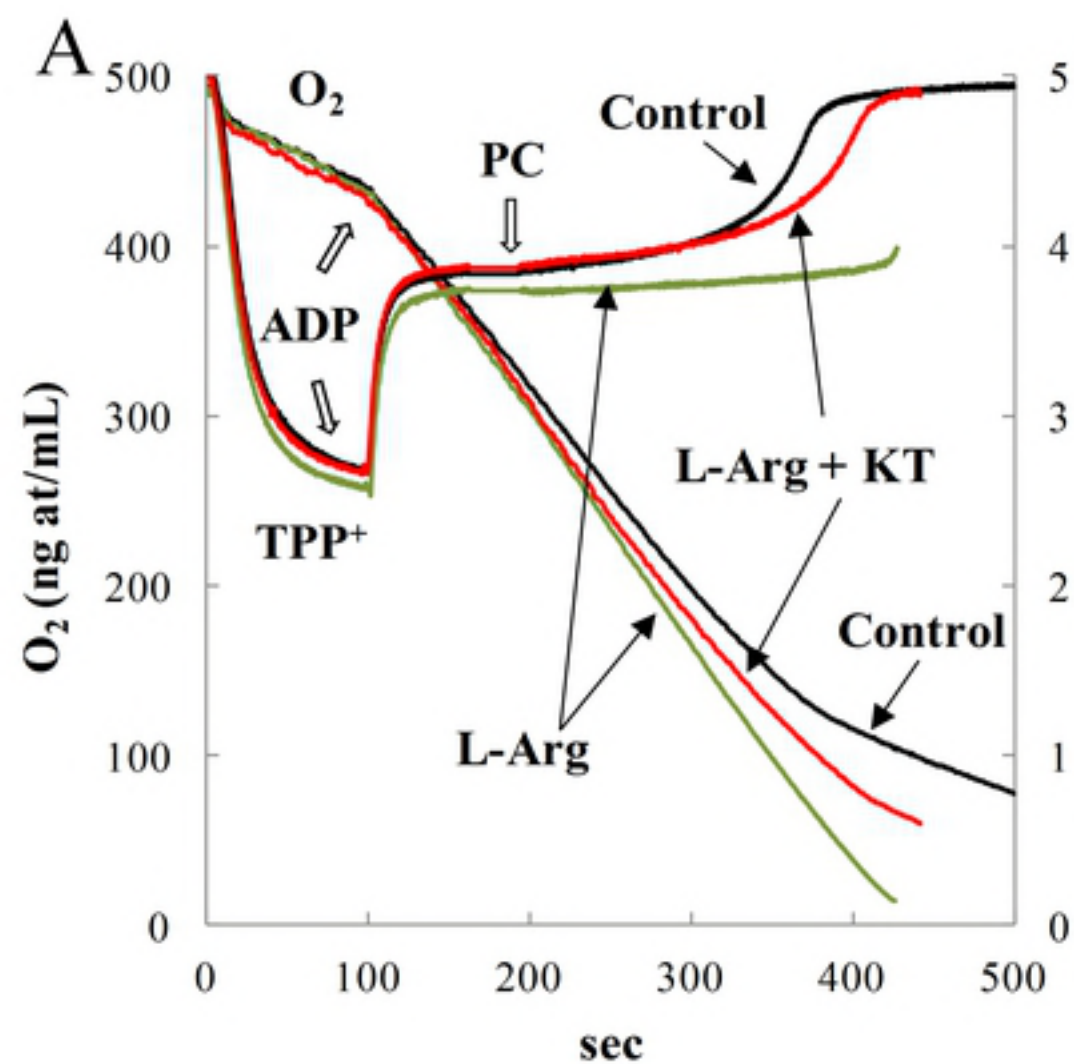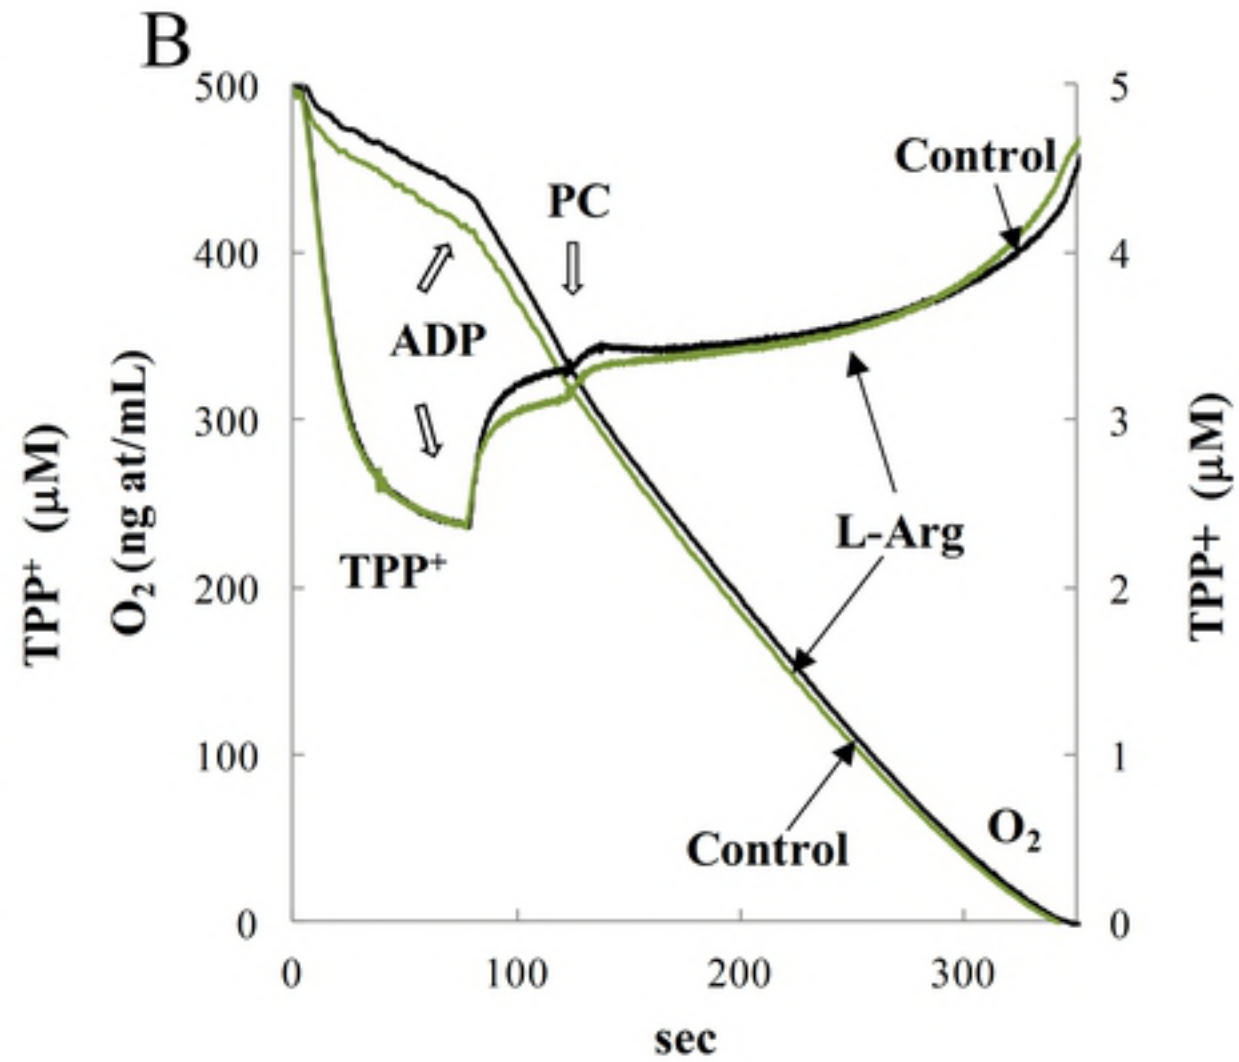

Fig4



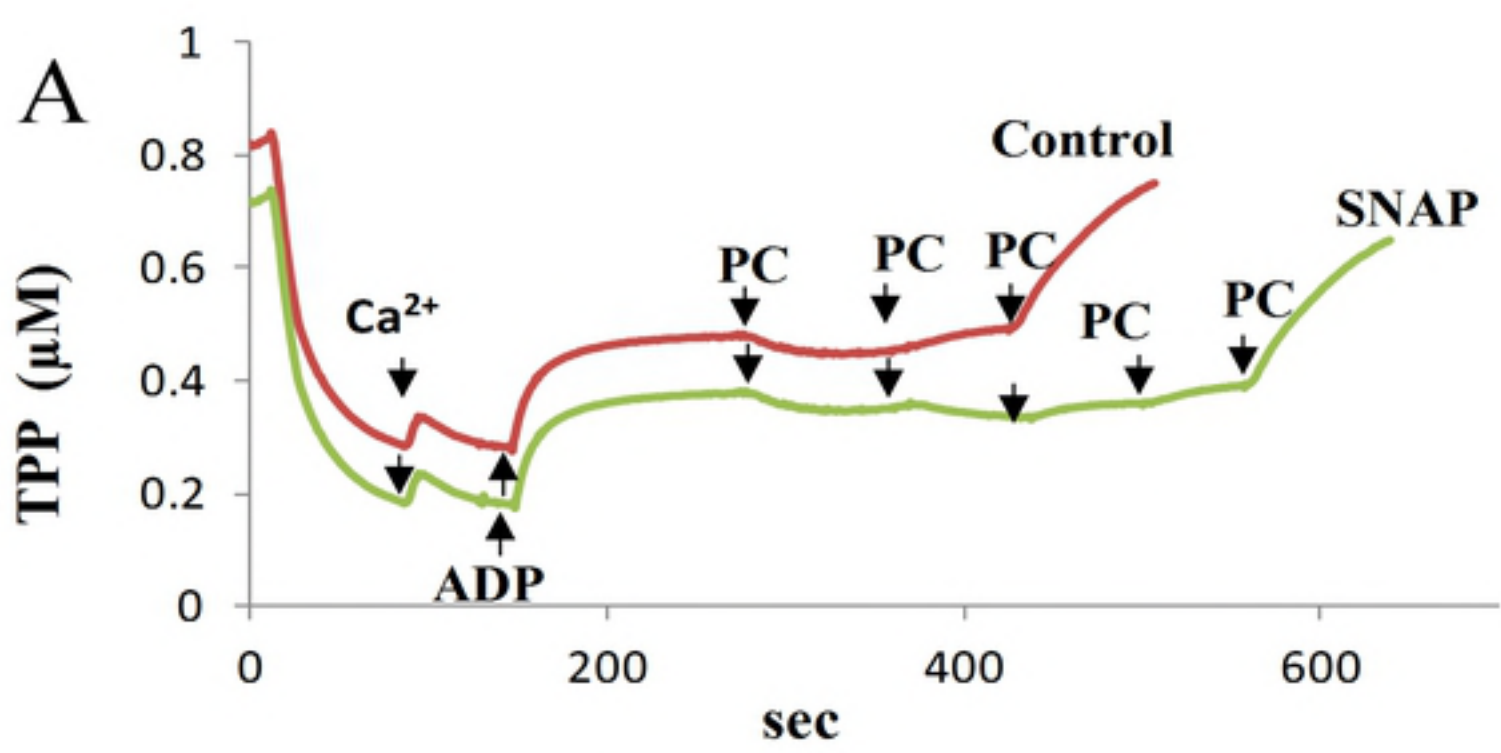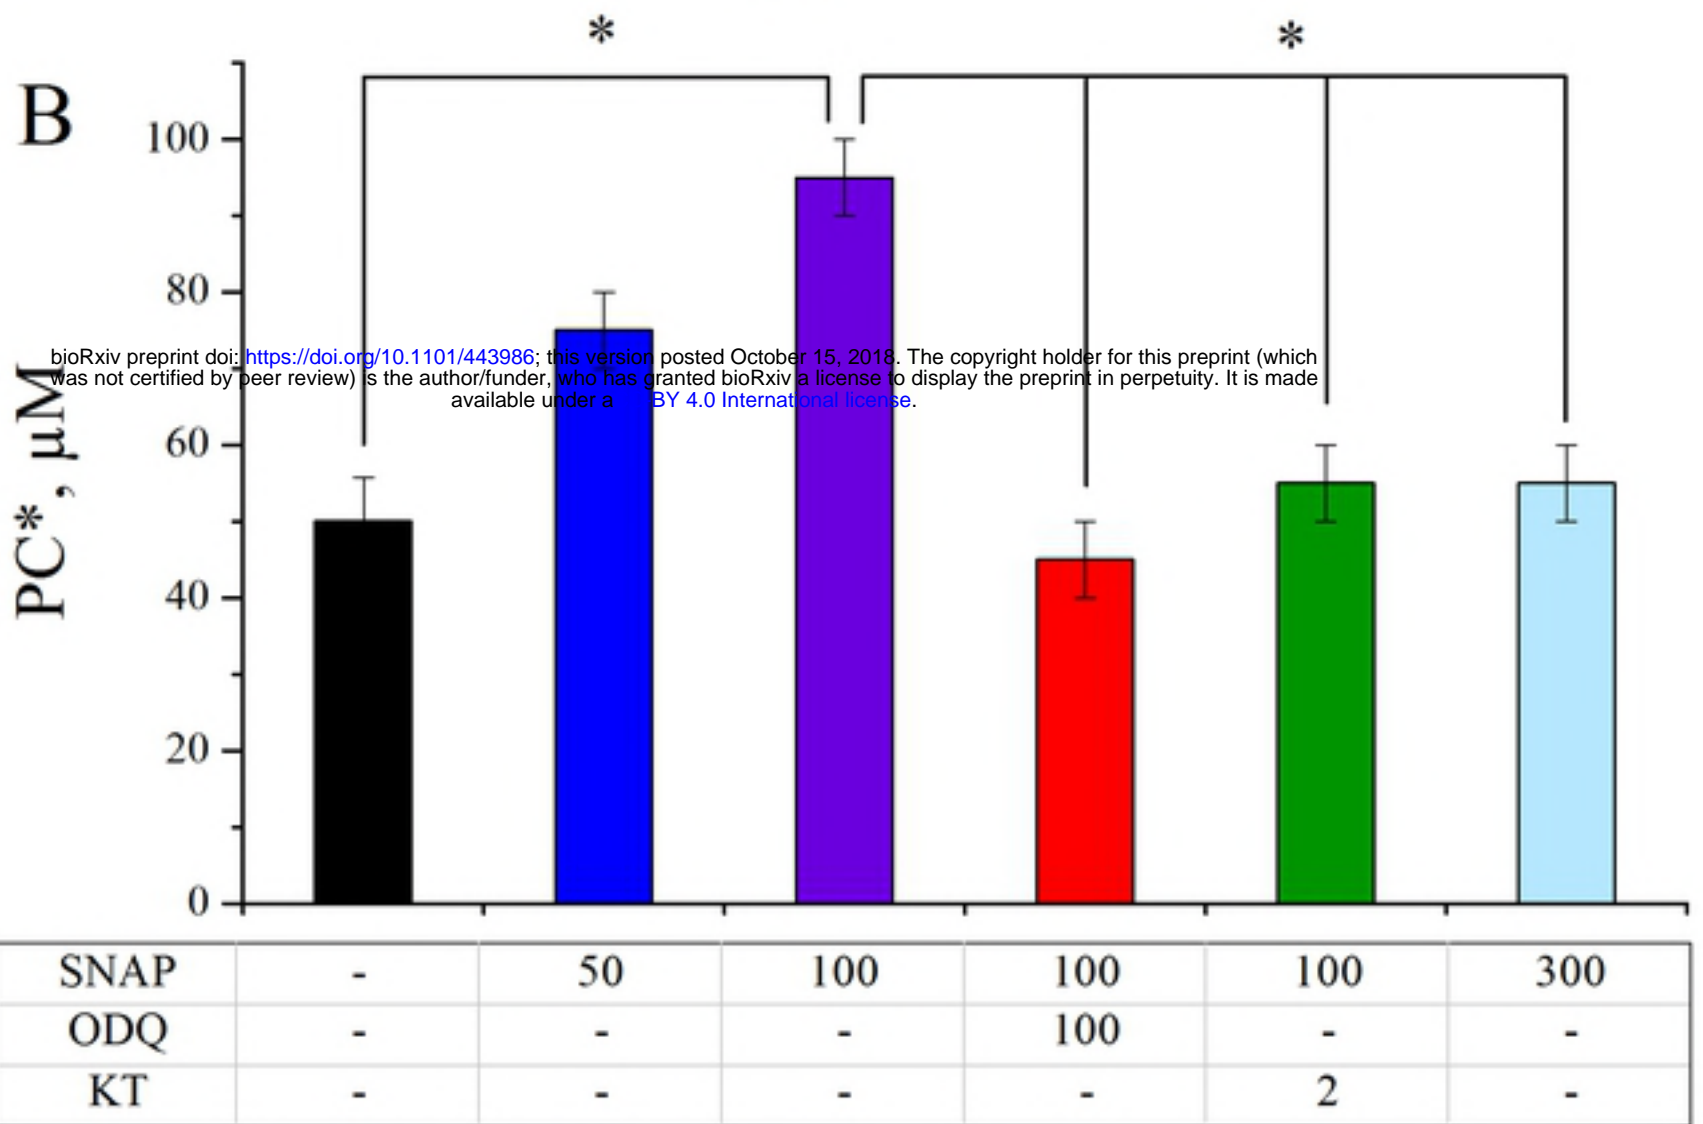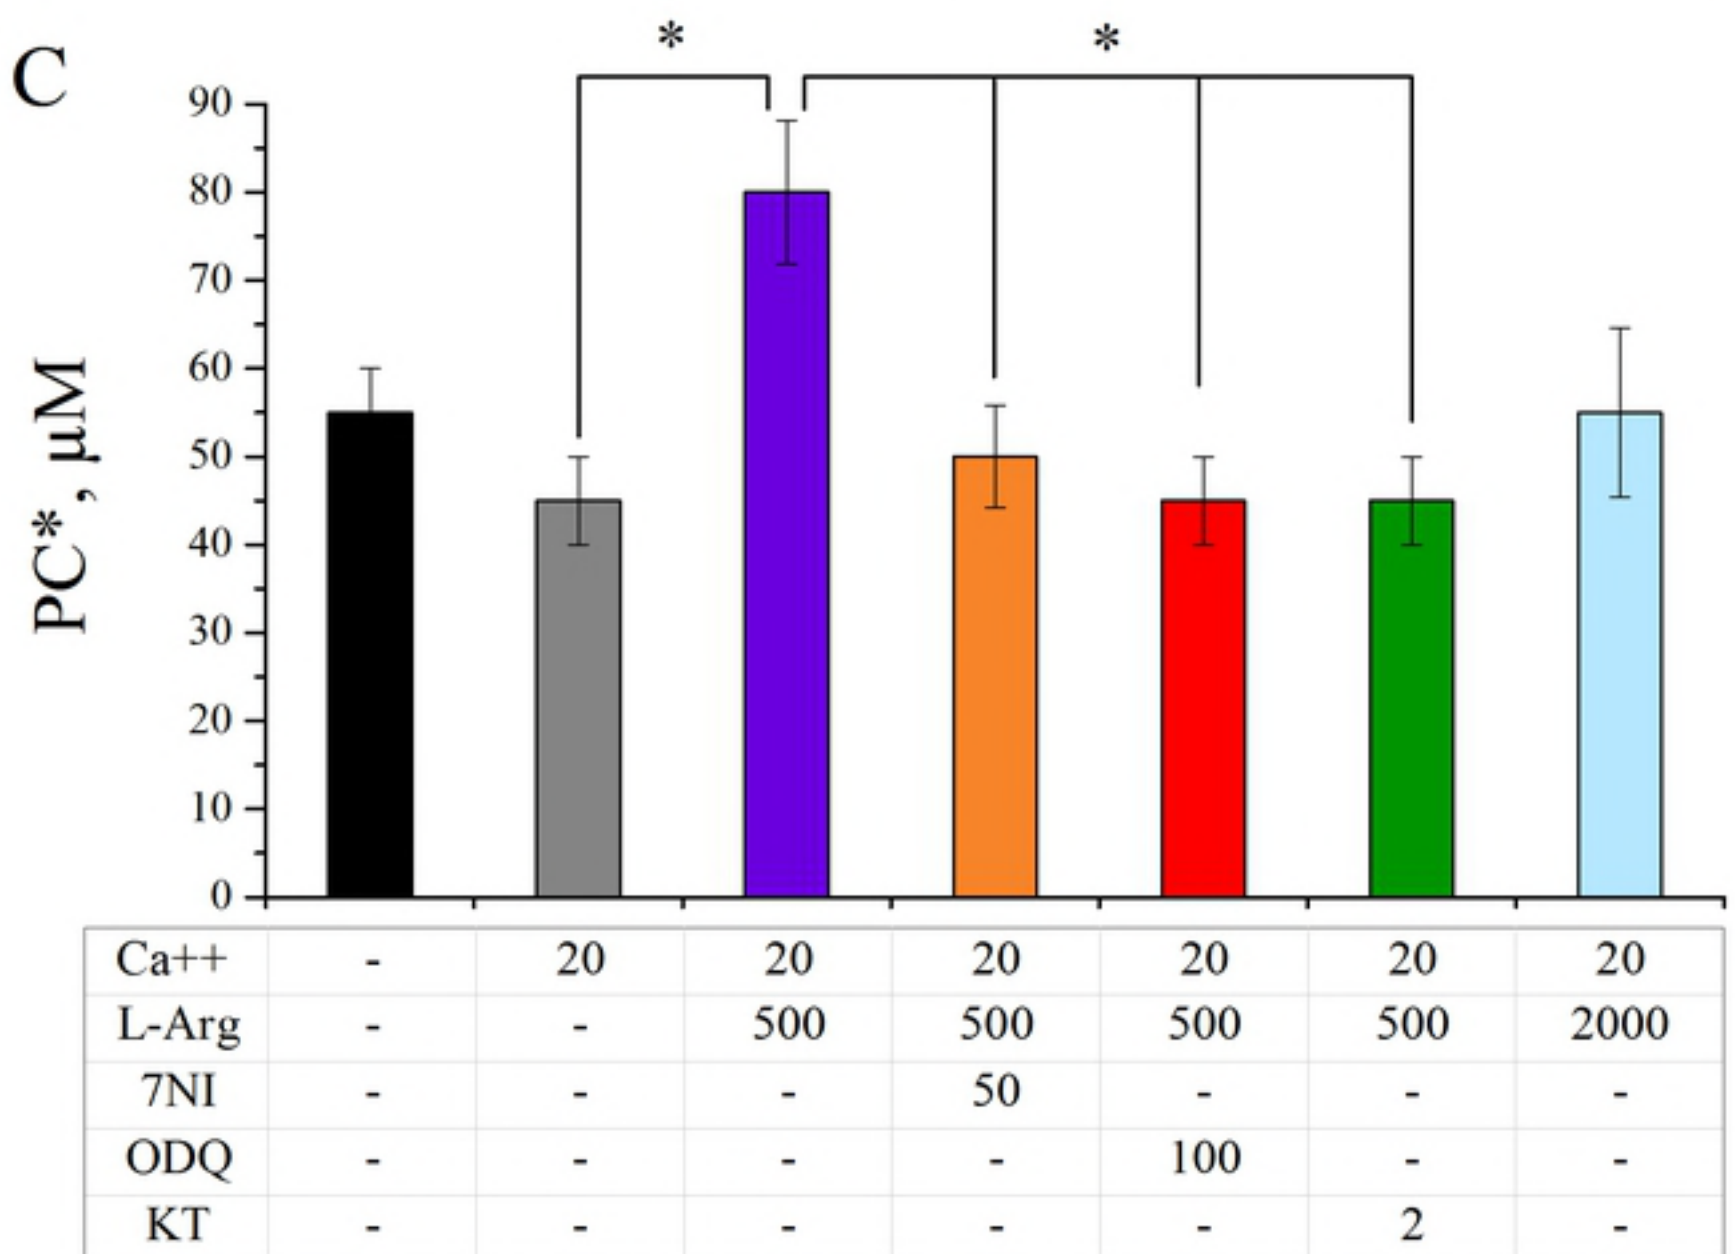

Fig5
